# Supplementary material for: Gender Differences in Political Media Coverage: A Meta-Analysis
Source: Oxford University Press journal article supplement (doi:10.1093/joc/jqz046), 2020-02-01
Supplement: dataset_jqz046.xls [file dataset_jqz046.xls]

## Sheet: Data
categorical	number	number	number	string	string	number	number	categorical (dummy)	string	string	categorical	string	number	string	categorical	string	string	categorical	categorical	categorical	string	categorical	numerical	numerical	numerical	numerical	string	number	number	percent	categorical	categorical	string	categorical	string	categorical	string	categorical	string	number	number	number	number	number	number	number	number	string	string
Main coder of the article	Order the rows were originally in	Publication identifier	Year of publication	Author(s) + year	Author(s) + year	Number of female authors	Number of authors	First author female (=1)	Title of publication	Journal, book or other outlet of publication	Journal, book or other outlet of publication	Full reference in APA style	Number of citations in Google Scholar on August 17, 2018	Country in which media coverage was studied	Categorization of countries	Political office under study	Political office under study	Type of political office studied	Level of the political office studied	Primary or general election	Electoral system of elected office (Source: www.idea.int)	Type of electoral system of elected office	Least squares index (LSq) of disproportionality according to Gallagher and Mitchell (2005), with updates from https://www.tcd.ie/Political_Science/people/michael_gallagher/ElSystems/index.php. Data from the year closest to begintime. For the United States, House figures (instead of figures on the presidential electoral college) were used. The year 1946 (closest year with available data) was used …	Effective number of parties at the electoral level (Eff Nv / ENEP) according to Gallagher and Mitchell (2005), with updates from https://www.tcd.ie/Political_Science/people/michael_gallagher/ElSystems/index.php. Data from the year closest to begintime. For the United States, House figures (instead of figures on the presidential electoral college) were used. The year 1946 (closest year with availa…	Effective number of parties at the parliamentary or legislative level (Eff Ns / ENPP) according to Gallagher and Mitchell (2005), with updates from https://www.tcd.ie/Political_Science/people/michael_gallagher/ElSystems/index.php. Data from the year closest to begintime. For the United States, House figures (instead of figures on the presidential electoral college) were used. The year 1946 (close…	Number of seats in parliament/legislature according to Gallagher and Mitchell (2005), with updates from https://www.tcd.ie/Political_Science/people/michael_gallagher/ElSystems/index.php. Data from the year closest to begintime. For the United States, House figures (instead of figures on the presidential electoral college) were used. The year 1946 (closest year with available data) was used for US…	List of years in which coverage was studied, separated by comma's. Spread of years (e.g. 2006-2010) only if years were analysed continuously or if exact years in the period are not indicated.	First year included in the study	Last year included in the study	Percentage of women in parliament (lower house if bicameral) at the national level in the first year under study, unless studied period is longer than ten years. Source: Archive of the Interparliamentary Union (from 1997) and wikipedia or worldbank (prior to 1997)	Campaign coverage, routine time coverage, or both studied	Type of content analysis: manual or automated	Medium of the coverage that is coded by researchers	Medium of the coverage that is coded by researchers. Coding of candidates' communication is not included here.	Newspaper selection	Types of newspapers covered	What controls are included, either in design or in the analyses	What kind of controls are included, either in design or in the analyses	Name of female candidate if only one	Number of countries	Number of races	Number of candidates	Number of female candidates	Number of newspapers or TV stations	Number of articles / news stories	Number of coded units	N in analysis in final data-analysis	Note: What is the coded unit (paragraph, etc.)?	Note: What is the analyzed unit?
coder	order	id	year	authors	authorsshort	authorsfemale	authorsnumber	authorsfirstfemale	title	outlet	outlettype	reference	citations	country	region	office	officeneat	officetype	officelevel	electiontype	electoralsystem	electoralsystemtype	disproportionality	numberofparties_enep	numberofparties_enpp	numberofseats	time	begintime	endtime	femalerepresentation	campaign	method	medium	mediumtype	newspaper	newspapertype	controls	controltype	namefemale	n_countries	n_races	n_candidates	n_femalecandidates	n_outlets	n_stories	n_codedunits	n_analysis	codedunitsnote	analyzedunitsnote
1. First author	1	1	1991	Kahn and Goldenberg (1991)	Kahn and Goldenberg (1991)	2	2	1	Women Candidates in the News: An Examination of Gender Differences in the U/S/ Senate Campaign Coverage	Public Opinion Quarterly	1. Journal article	Kahn, K. F., & Goldenberg, E. N. (1991). Women candidates in the news: An examination of gender differences in US Senate campaign coverage. Public opinion quarterly, 55(2), 180-199.	378	United States	1. United States	Senate	Senator	2. Legislative	2. National	1. General election	Plurality/Majority FPTP 1 435 435 FPTP (Electoral System Family | Electoral System for National Legislature | Number of tiers | Legislative size (directly elected) | Legislative size (Voting members) | Electoral system for the president | Source: www.idea.int )	1. Plurality/Majority	5.71	2.02	1.89	435	1982, 1984, 1986	1982	1986	4.82759	1. Campaign	1. Manual content analysis	Newspapers	1. Newspapers	The newspaper with the largest circulation in each state in the sample was analyzed	4. Unknown	Incumbent (challenger, open), competitiveness. Control for incumbency and competitiveness by splitting out.	2. Incumbency, competitiveness, standing in the poll, type of seat, party, etc.	NA	1	26	52	12	21	.	7086	26; 7086	Paragraphs by candidate (meaning that a paragraph can me coded for multiple candidates). The total number is not mentioned, but the number of paragraphs coded with male candidates is 5708 and with female candidates 1378 (adding up to 7086).	For visibility analysis the race is the level of analysis, for substance of coverage the coded unit (paragraph) is the unit of analysis. Sometimes 'articles' are also mentioned as the unit, but it is unclear whether this refers to a higher level than paragraphs.
1. First author	2	2	1994	Kahn (1994)	Kahn (1994)	1	1	1	The Distorted Mirror: Press Coverage of Women Candidates for Statewide Office	Journal of Politics	1. Journal article	Kahn, K. F. (1994). The distorted mirror: Press coverage of women candidates for statewide office. The Journal of Politics, 56(1), 154-173.	327	United States	1. United States	Senate	Senate	2. Legislative	2. National	1. General election	Plurality/Majority FPTP 1 435 435 FPTP (Electoral System Family | Electoral System for National Legislature | Number of tiers | Legislative size (directly elected) | Legislative size (Voting members) | Electoral system for the president | Source: www.idea.int )	1. Plurality/Majority	5.71	2.02	1.89	435	1982-1988	1982	1988	4.82759	1. Campaign	1. Manual content analysis	Newspapers, TV ads	1. Newspapers	The newspapers chosen for analysis were whenever possible those with the largest circulation in the state	4. Unknown	Incumbent, competitiveness, own message candidates. Control for incumbency and competitiveness by splitting out, control for own message by comparing.	3. Both candidate communication and incumbency etc.	NA	1	26	52	12	21	.	7086	26; 7086	Paragraphs by candidate (meaning that a paragraph can me coded for multiple candidates). The total number is not mentioned, but the number of paragraphs coded with male candidates is 5708 and with female candidates 1378 (adding up to 7086).	For visibility analysis the race is the level of analysis, for substance of coverage the coded unit (paragraph) is the unit of analysis. Sometimes 'articles' are also mentioned as the unit, but it is unclear whether this refers to a higher level than paragraphs.
1. First author	3	2	1994	Kahn (1994)	Kahn (1994)	1	1	1	The Distorted Mirror: Press Coverage of Women Candidates for Statewide Office	Journal of Politics	1. Journal article	Kahn, K. F. (1994). The distorted mirror: Press coverage of women candidates for statewide office. The Journal of Politics, 56(1), 154-173.	327	United States	1. United States	Governor	Governor	1. Executive	3. Sub-national (state, regional or provincial)	1. General election	Plurality/Majority FPTP 1 435 435 FPTP (Electoral System Family | Electoral System for National Legislature | Number of tiers | Legislative size (directly elected) | Legislative size (Voting members) | Electoral system for the president | Source: www.idea.int )	1. Plurality/Majority	5.71	2.02	1.89	435	1982-1988	1982	1988	4.82759	1. Campaign	1. Manual content analysis	Newspapers, TV ads	1. Newspapers	The newspapers chosen for analysis were whenever possible those with the largest circulation in the state	4. Unknown	Incumbent, competitiveness, own message candidates. Control for incumbency and competitiveness by splitting out, control for own message by comparing.	3. Both candidate communication and incumbency etc.	NA	1	21	42	10	max 21	.	6780	42; 6780	Paragraphs by candidate (meaning that a paragraph can me coded for multiple candidates). The total number is not mentioned, but the number of paragraphs coded with male candidates is 5219 and with female candidates 1561 (adding up to 6780).	For visibility analysis the race is the level of analysis, for substance of coverage the coded unit (paragraph) is the unit of analysis. Sometimes 'articles' are also mentioned as the unit, but it is unclear whether this refers to a higher level than paragraphs.
1. First author	4	3	2005	Heldman, Caroll and Olson (2005)	Heldman et al. (2005)	3	3	1	"She Brought Only a Skirt": Print Media Coverage of Elizabeth Dole's Bid for the Republican Presidential Nomination	Political Communication	1. Journal article	Heldman, C., Carroll, S. J., & Olson, S. (2005). “She brought only a skirt”: print media coverage of Elizabeth Dole's bid for the Republican presidential nomination. Political Communication, 22(3), 315-335.	231	United States	1. United States	Presidential primary (Republican)	Presidential nominee	1. Executive	2. National	2. Primary election	Plurality/Majority FPTP 1 435 435 FPTP (Electoral System Family | Electoral System for National Legislature | Number of tiers | Legislative size (directly elected) | Legislative size (Voting members) | Electoral system for the president | Source: www.idea.int )	1. Plurality/Majority	2.71	2.21	2.01	435	1999	1999	1999	13.3	1. Campaign	1. Manual content analysis	Newspapers (sample each 25th article of 'major papers' category in LexisNexis with search string of leader names)	1. Newspapers	Major Papers section of Lexis-Nexis (which includes more than 70 daily newspapers from across the nation)	4. Unknown	Standing in the polls, controlled by comparing informally.	2. Incumbency, competitiveness, standing in the poll, type of seat, party, etc.	Elizabeth Dole	1	1	6	1	70	421	421	421	Articles by candidate (meaning that an article can me coded for multiple candidates).	Articles by candidate (meaning that an article can me coded for multiple candidates).
1. First author	5	4	2001	Aday and Devitt (2001)	Aday and Devitt (2001)	0	2	0	Style over Substance: Newspaper Coverage of Elizabeth Dole's Presidential Bid	International Journal of Press/Politics	1. Journal article	Aday, S., & Devitt, J. (2001). Style over substance: Newspaper coverage of Elizabeth Dole's presidential bid. Harvard International Journal of Press/Politics, 6(2), 52-73.	152	United States	1. United States	Presidential primary (Republican)	Presidential nominee	1. Executive	2. National	2. Primary election	Plurality/Majority FPTP 1 435 435 FPTP (Electoral System Family | Electoral System for National Legislature | Number of tiers | Legislative size (directly elected) | Legislative size (Voting members) | Electoral system for the president | Source: www.idea.int )	1. Plurality/Majority	2.71	2.21	2.01	435	1999	1999	1999	13.3	1. Campaign	1. Manual content analysis	5 Newspapers	1. Newspapers	Des Moines Register, New York Times, Los Angeles Times, USA Today, Washington Post. Three months of coverage.	1. Broadsheet / quality	No formal controls. Informally compare results with knowlegde on the candidate's own campaign and the issues she stressed.	5. None	Elizabeth Dole	1	1	4	1	5	462	3080	3080	Paragraphs by candidate (meaning that a paragraph can me coded for multiple candidates). The total number of coded paragraphs is 3899 (reconstructued from Table 1), the number of coded paragraph-candidate combinations is 3080.	Paragraphs by candidate (meaning that a paragraph can me coded for multiple candidates).
1. First author	6	5	2002	Devitt (2002)	Devitt (2002)	1	1	0	Framing Gender on the Campaign Trail: Female Gubernatorial Candidates and the Press	Journalism & Mass Communication Quarterly	1. Journal article	Devitt, J. (2002). Framing gender on the campaign trail: Female gubernatorial candidates and the press. Journalism & Mass Communication Quarterly, 79(2), 445-463.	185	United States	1. United States	Governor	Governor	1. Executive	3. Sub-national (state, regional or provincial)	1. General election	Plurality/Majority FPTP 1 435 435 FPTP (Electoral System Family | Electoral System for National Legislature | Number of tiers | Legislative size (directly elected) | Legislative size (Voting members) | Electoral system for the president | Source: www.idea.int )	1. Plurality/Majority	2.71	2.21	2.01	435	1998	1998	1998	11.7	1. Campaign	1. Manual content analysis	6 newspapers	1. Newspapers	The analysis included campaign coverage of six daily newspapers: the Arizona Republic (Arizona), the Boston Globe (Rhode Island), the Denver Post (Colorado), the Rocky Mountain News (Colorado),t he Providence Journal-Bulletin (Rhode Island), and the Wash- ington Post (Maryland).	4. Unknown	Incumbency is controlled for by design: one female incumbent, two female challengers and one open seat is selected.	2. Incumbency, competitiveness, standing in the poll, type of seat, party, etc.	NA	1	4	8	4	6	237	2698	2698	Paragraphs with a coded 'frame'. Two opponents may appear in the same paragraph, in which cases it appears to be coded for both (not entirely clear though).	Paragraphs with a coded 'frame'. Two opponents may appear in the same paragraph, in which cases it appears to be coded for both (not entirely clear though).
1. First author	7	6	1997	Smith (1997)	Smith (1997)	0	1	0	When All’s Fair: Signs of Parity in Media Coverage of female Candidates	Political Communication	1. Journal article	Smith, K. B. (1997). When all's fair: Signs of parity in media coverage of female candidates. Political Communication, 14(1), 71-82.	143	United States	1. United States	Senate, governor	Senator, governor	3. Executive and legislative	5. Combination of federal, national and/or sub-national level	1. General election	Plurality/Majority FPTP 1 435 435 FPTP (Electoral System Family | Electoral System for National Legislature | Number of tiers | Legislative size (directly elected) | Legislative size (Voting members) | Electoral system for the president | Source: www.idea.int )	1. Plurality/Majority	1.31	2.08	2	435	1994	1994	1994	11.0345	1. Campaign	1. Manual content analysis	Newspapers	1. Newspapers	Copies of the largest-circulation newspaper in the state that covered the campaign were coded for each of the 40 days prior to the November 8 election	4. Unknown	Controls are: Incumbency, newspaper endorsement, sex of author, proximity of the election, standing in the polls, democratic incumbent, size of newspaper.	2. Incumbency, competitiveness, standing in the poll, type of seat, party, etc.	NA	1	11	22	11	7	.	.	440	.	Days by candidate in a pooled time series.
1. First author	8	7	2016	Lühiste and Banducci (2016)	Lühiste and Banducci (2016)	2	2	1	Invisible women? Explaining the Gender Gap in Candidates News Media Coverage	Politics & Gender	1. Journal article	Lühiste, M., & Banducci , S. (2016). Invisible women? Comparing candidates’ news coverage in Europe. Politics & Gender, 12(2), 223-253.	8	EU: 25 countries	2. Europe	European parliament	MEP	2. Legislative	1. Supranational	1. General election	Proportional representation (Party Lists and Single Transferable Vote depending on country)	3. Proportional Representation	.	.	.	.	2009	2009	2009	24.025	1. Campaign	1. Manual content analysis	EES media data: TV and newspapers	3. Both newspapers and TV	at least three newspapers (two “quality” and one tabloid) per country	3. Both	Incumbency, list position (viability), type of proportional system: open list, ordered list and closed list.	2. Incumbency, competitiveness, standing in the poll, type of seat, party, etc.	NA	25	25	7661	.	142	.	.	7661	News items for TV are the coded unit, for newspapers articles. "With regard to story selection for television, all news items have been coded. For newspapers, due to the number of stories in a daily newspaper, a smaller sample was drawn. All news items on the front page and all news items on one randomly selected page were coded. In addition, in order to capture all news about the elections, all …	Candidates. Data are censored (not all candidates are in the content analysis dataset), number of censored candidated is 7133 and number of uncensored candidates is 528. Tone analysis is based on 270 cases of candidates with an actor code and at least some media coverage.
1. First author	9	8	2006	Jalalzai (2006)	Jalalzai (2006)	1	1	1	Women Candidates and the Media: 1992-2000 Elections	Politics and Policy	1. Journal article	Jalalzai, F. (2006). Women Candidates and the Media: 1992‐2000 Elections. Politics & Policy, 34(3), 606-633.	95	United States	1. United States	Senate	Senator	2. Legislative	2. National	1. General election	Plurality/Majority FPTP 1 435 435 FPTP (Electoral System Family | Electoral System for National Legislature | Number of tiers | Legislative size (directly elected) | Legislative size (Voting members) | Electoral system for the president | Source: www.idea.int )	1. Plurality/Majority	7.08	2.14	1.94	435	1992, 1994, 1996, 1998, 2000	1992	2000	6.89655	1. Campaign	1. Manual content analysis	Newspapers (newspaper with highest circulation in the state)	1. Newspapers	Each race chosen was paired with the newspaper with the highest circulation in the state where the election was held.	4. Unknown	Incumbent (challenger, open), competitiveness. Control for incumbency and competitiveness by splitting out.	2. Incumbency, competitiveness, standing in the poll, type of seat, party, etc.	NA	1	15	30	13	12	.	.	.	Paragraphs within newspaper articles. Probably paragraphs can be coded for both candidates if both are mentioned.	Results give averages per week, e.g. the share of paragraphs devoted to issues published per week per candidate.
1. First author	10	8	2006	Jalalzai (2006)	Jalalzai (2006)	1	1	1	Women Candidates and the Media: 1992-2000 Elections	Politics and Policy	1. Journal article	Jalalzai, F. (2006). Women Candidates and the Media: 1992‐2000 Elections. Politics & Policy, 34(3), 606-633.	95	United States	1. United States	Governor	Governor	1. Executive	3. Sub-national (state, regional or provincial)	1. General election	Plurality/Majority FPTP 1 435 435 FPTP (Electoral System Family | Electoral System for National Legislature | Number of tiers | Legislative size (directly elected) | Legislative size (Voting members) | Electoral system for the president | Source: www.idea.int )	1. Plurality/Majority	7.08	2.14	1.94	435	1993, 1994, 1996, 1997, 1998, 2000	1993	2000	11.0345	1. Campaign	1. Manual content analysis	Newspapers (newspaper with highest circulation in the state)	1. Newspapers	Each race chosen was paired with the newspaper with the highest circulation in the state where the election was held.	4. Unknown	Incumbent (challenger, open), competitiveness. Control for incumbency and competitiveness by splitting out.	2. Incumbency, competitiveness, standing in the poll, type of seat, party, etc.	NA	1	11	22	7	10	.	.	.	Paragraphs within newspaper articles. Probably paragraphs can be coded for both candidates if both are mentioned.	Results give averages per week, e.g. the share of paragraphs devoted to issues published per week per candidate.
1. First author	11	9	2008	Kittilson and Fridkin (2008)	Kittelson and Fridkin (2008)	2	2	1	Gender, Candidate Portrayals and Election Campaigns: A Comparative Perspective	Politics & Gender	1. Journal article	Kittilson, M. C., & Fridkin, K. (2008). Gender, candidate portrayals and election campaigns: A comparative perspective. Politics & Gender, 4(3), 371-392.	114	United States	1. United States	House/senate	House Representative/Senator	2. Legislative	2. National	1. General election	Plurality/Majority FPTP 1 435 435 FPTP (Electoral System Family | Electoral System for National Legislature | Number of tiers | Legislative size (directly elected) | Legislative size (Voting members) | Electoral system for the president | Source: www.idea.int )	1. Plurality/Majority	1.57	2.1	1.99	435	2006	2006	2006	16.3	1. Campaign	1. Manual content analysis	1 newspaper per country (three broadsheet dailies: the Toronto Star, Sydney Morning Herald, and New York Times)	1. Newspapers	New York Times (through Access World News)	1. Broadsheet / quality	No controls	5. None	NA	1	.	187	41	1	157	157	426	Articles by candidate (meaning that an article can me coded for multiple candidates).	Articles by candidates ("Each candidate mentioned in each article is a separate observation in our data set")
1. First author	12	9	2008	Kittilson and Fridkin (2008)	Kittelson and Fridkin (2008)	2	2	1	Gender, Candidate Portrayals and Election Campaigns: A Comparative Perspective	Politics & Gender	1. Journal article	Kittilson, M. C., & Fridkin, K. (2008). Gender, candidate portrayals and election campaigns: A comparative perspective. Politics & Gender, 4(3), 371-392.	114	Canada	3. Other English speaking country	House/senate	House Representative/Senator	2. Legislative	2. National	1. General election	Plurality/Majority FPTP 1 338 338 Not applicable (Electoral System Family | Electoral System for National Legislature | Number of tiers | Legislative size (directly elected) | Legislative size (Voting members) | Electoral system for the president | Source: www.idea.int)	1. Plurality/Majority	8.61	3.75	3.22	308	2006	2006	2006	20.8	1. Campaign	1. Manual content analysis	1 newspaper per country (three broadsheet dailies: the Toronto Star, Sydney Morning Herald, and New York Times)	1. Newspapers	Toronto Star (through Access World News)	1. Broadsheet / quality	No controls	5. None	NA	1	.	148	42	1	129	129	417	Articles by candidate (meaning that an article can me coded for multiple candidates).	Articles by candidates ("Each candidate mentioned in each article is a separate observation in our data set")
1. First author	13	9	2008	Kittilson and Fridkin (2008)	Kittelson and Fridkin (2008)	2	2	1	Gender, Candidate Portrayals and Election Campaigns: A Comparative Perspective	Politics & Gender	1. Journal article	Kittilson, M. C., & Fridkin, K. (2008). Gender, candidate portrayals and election campaigns: A comparative perspective. Politics & Gender, 4(3), 371-392.	114	Australia	3. Other English speaking country	House/senate	House Representative/Senator	2. Legislative	2. National	1. General election	Plurality/Majority AV 1 150 150 Not applicable (Electoral System Family | Electoral System for National Legislature | Number of tiers | Legislative size (directly elected) | Legislative size (Voting members) | Electoral system for the president | Source: www.idea.int)	1. Plurality/Majority	8.6	3.17	2.44	150	2004	2004	2004	24.7	1. Campaign	1. Manual content analysis	1 newspaper per country (three broadsheet dailies: the Toronto Star, Sydney Morning Herald, and New York Times)	1. Newspapers	Sydney Morning Herald (through Access World News)	1. Broadsheet / quality	No controls	5. None	NA	1	.	104	30	1	149	149	269	Articles by candidate (meaning that an article can me coded for multiple candidates).	Articles by candidates ("Each candidate mentioned in each article is a separate observation in our data set")
1. First author	14	10	2007	Atkeson and Krebs (2008)	Atkeson and Krebs (2008)	1	2	1	Press Coverage of Mayoral Candidates. The Role of Gender in News Reporting and Campaign Issue Speech	Political Research Quarterly	1. Journal article	Atkeson, L. R., & Krebs, T. B. (2008). Press coverage of mayoral candidates: The role of gender in news reporting and campaign issue speech. Political Research Quarterly, 61(2), 239-252.	70	United States	1. United States	Mayors	Mayor	1. Executive	4. Local	1. General election	Plurality/Majority FPTP. Exact methods of election may differ per municipality.	1. Plurality/Majority	3.15	2.25	2.02	435	2000-2003	2000	2003	13.3333	1. Campaign	1. Manual content analysis	1 newspaper per race	1. Newspapers	One local newspaper per mayoral race: Plain-Dealer, Free Press, Morning News, Chronicle, Bee, Post-Intelligencer for respectively Cleveland, Detroit, Dallas, Houston, Sacramento, Seattle.	4. Unknown	Control by design: all non-partisan, open-seat, competetive races.	2. Incumbency, competitiveness, standing in the poll, type of seat, party, etc.	NA	1	6	12	3	6	476	10203	10203	Paragraphs	Paragraphs by race (mixed gender race or male-only race)
1. First author	15	11	2001	Bystrom, Robertson and Banwart (2001)	Bystrom et al. (2001)	3	3	1	Framing the Fight. An Analysis of Media Coverage of Female and Male Candidates in Primary Races for Governor and U.S. Senate in 2000	American Behavioral Scientist	1. Journal article	Bystrom, D. G., Robertson, T. A., & Banwart, M. C. (2001). Framing the fight: An analysis of media coverage of female and male candidates in primary races for governor and US Senate in 2000. American Behavioral Scientist, 44(12), 1999-2013.	158	United States	1. United States	Senate and governor primaries	Senator and governor (primary)	3. Executive and legislative	5. Combination of federal, national and/or sub-national level	2. Primary election	Plurality/Majority FPTP 1 435 435 FPTP (Electoral System Family | Electoral System for National Legislature | Number of tiers | Legislative size (directly elected) | Legislative size (Voting members) | Electoral system for the president | Source: www.idea.int )	1. Plurality/Majority	3.15	2.25	2.02	435	2000	2000	2000	13.3	1. Campaign	1. Manual content analysis	Newspapers	1. Newspapers	The newspapers with the largest circulation, as identified by the Audit Bureau of Circulation, from each respective state.	4. Unknown	No formal controls, but control by design for party (primaries, so within party contests)	5. None	NA	1	.	61	20	14	707	707	707	Articles	Articles, which can be female-focused or male-focused
1. First author	16	12	2003	Banwart, Bystrom and Robertson (2003)	Banwart et al. (2003)	3	3	1	From the primary to the general election. A comparative analysis of candidate media coverage in mixed-gender 2000 races for governor and U.S. Senate	American Behavioral Scientist	1. Journal article	Banwart, M. C., Bystrom, D. G., & Robertson, T. (2003). From the primary to the general election: A comparative analysis of candidate media coverage in mixed-gender 2000 races for governor and US Senate. American Behavioral Scientist, 46(5), 658-676.	108	United States	1. United States	Senate, governor; comparing primary and general		3. Executive and legislative	5. Combination of federal, national and/or sub-national level	2. Primary election	Plurality/Majority FPTP 1 435 435 FPTP (Electoral System Family | Electoral System for National Legislature | Number of tiers | Legislative size (directly elected) | Legislative size (Voting members) | Electoral system for the president | Source: www.idea.int )	1. Plurality/Majority	3.15	2.25	2.02	435	2000	2000	2000	13.3333	1. Campaign	1. Manual content analysis	Newspapers	1. Newspapers	Newspapers were chosen based on large circulation and their availability online.	4. Unknown	No formal controls. Informally compare results with knowlegde on the candidate's own campaign.	5. None	NA	1	17	62	20	17	707	707	707	Articles	Articles, which can be female-focused or male-focused
1. First author	17	12	2003	Banwart, Bystrom and Robertson (2003)	Banwart et al. (2003)	3	3	1	From the primary to the general election. A comparative analysis of candidate media coverage in mixed-gender 2000 races for governor and U.S. Senate	American Behavioral Scientist	1. Journal article	Banwart, M. C., Bystrom, D. G., & Robertson, T. (2003). From the primary to the general election: A comparative analysis of candidate media coverage in mixed-gender 2000 races for governor and US Senate. American Behavioral Scientist, 46(5), 658-676.	108	United States	1. United States	Senate, governor; comparing primary and general	Senator and governor (primary and general)	3. Executive and legislative	5. Combination of federal, national and/or sub-national level	1. General election	Plurality/Majority FPTP 1 435 435 FPTP (Electoral System Family | Electoral System for National Legislature | Number of tiers | Legislative size (directly elected) | Legislative size (Voting members) | Electoral system for the president | Source: www.idea.int )	1. Plurality/Majority	3.15	2.25	2.02	435	2000	2000	2000	13.3333	1. Campaign	1. Manual content analysis	Newspapers	1. Newspapers	Newspapers were chosen based on large circulation and their availability online.	4. Unknown	No formal controls. Informally compare results with knowlegde on the candidate's own campaign.	5. None	NA	1	12	24	12	12	578	578	578	Articles	Articles, which can be female-focused or male-focused
1. First author	18	13	2012	Bode and Hennings (2012)	Bode and Hennings (2012)	2	2	1	Mixed Signals? Gender and the Media's Coverage of the 2008 Vice Presidential Candidates	Politics & Policy	1. Journal article	Bode, L., & Hennings, V. M. (2012). Mixed signals? Gender and the media's coverage of the 2008 vice presidential candidates. Politics & Policy, 40(2), 221-257.	18	United States	1. United States	Vice-presidential candidates	Vice-president	1. Executive	2. National	1. General election	Plurality/Majority FPTP 1 435 435 FPTP (Electoral System Family | Electoral System for National Legislature | Number of tiers | Legislative size (directly elected) | Legislative size (Voting members) | Electoral system for the president | Source: www.idea.int )	1. Plurality/Majority	4.01	2.09	1.94	435	2008	2008	2008	17	1. Campaign	2. Automated content analysis	Newspapers, TV, blogs	1. Newspapers	Three newspapers (NY Times, Washington Post, USA today)	1. Broadsheet / quality	No controls	5. None	Sarah Palin	1	1	2	1	3	1676	.	.	Word counts in articles by candidate (meaning that an article can me coded for multiple candidates).	Word counts. "Reported values are risk ratios, or the proportion of words in that category in Palin coverage divided by the proportion of words in that category in Biden coverage. Ratios > 1, thus, reflect a greater tendency of those words to appear in Palin-only coverage, whereas ratios < 1 reflect a greater tendency of those words to appear in Biden-only coverage. The further the ratio is from …
1. First author	19	13	2012	Bode and Hennings (2012)	Bode and Hennings (2012)	2	2	1	Mixed Signals? Gender and the Media's Coverage of the 2008 Vice Presidential Candidates	Politics & Policy	1. Journal article	Bode, L., & Hennings, V. M. (2012). Mixed signals? Gender and the media's coverage of the 2008 vice presidential candidates. Politics & Policy, 40(2), 221-257.	18	United States	1. United States	Vice-presidential candidates	Vice-president	1. Executive	2. National	1. General election	Plurality/Majority FPTP 1 435 435 FPTP (Electoral System Family | Electoral System for National Legislature | Number of tiers | Legislative size (directly elected) | Legislative size (Voting members) | Electoral system for the president | Source: www.idea.int )	1. Plurality/Majority	4.01	2.09	1.94	435	2008	2008	2008	17	1. Campaign	2. Automated content analysis	Newspapers, TV, blogs	2. TV	NA	9. Not applicable	No controls	5. None	Sarah Palin	1	1	2	1	5	697	.	.	Word countrs in stories on "LexisNexis transcripts of the three major networks’ evening news broadcasts (NBC Nightly News with Brian Williams, ABC World News with Charles Gibson, and CBS Evening News with Katie Couric), as well as CNN and Fox News equivalents (CNN Situation Room and Fox Special Report with Brit Hume),5 which together encompass the vast majority of national television evening news…	Word counts. "Reported values are risk ratios, or the proportion of words in that category in Palin coverage divided by the proportion of words in that category in Biden coverage. Ratios > 1, thus, reflect a greater tendency of those words to appear in Palin-only coverage, whereas ratios < 1 reflect a greater tendency of those words to appear in Biden-only coverage. The further the ratio is from …
1. First author	20	14	2002	Robertson, Conley, Szymczynskab and Thompson (2002)	Robertson et al. (2002)	4	4	1	Gender and the media: An investigation of gender, media, and politics in the 2000 election	New Jersey Journal of Communication	1. Journal article	Robertson, T., Conley, A., Szymczynska, K., & Thompson, A. (2002). Gender and the media: An investigation of gender, media, and politics in the 2000 election. Atlantic Journal of Communication, 10(1), 104-117.	10	United States	1. United States	Senate, governor		3. Executive and legislative	5. Combination of federal, national and/or sub-national level	1. General election	Plurality/Majority FPTP 1 435 435 FPTP (Electoral System Family | Electoral System for National Legislature | Number of tiers | Legislative size (directly elected) | Legislative size (Voting members) | Electoral system for the president | Source: www.idea.int )	1. Plurality/Majority	3.15	2.25	2.02	435	2000	2000	2000	13.3333	1. Campaign	1. Manual content analysis	newspapers (one newspaper per race, largest in circulation).	1. Newspapers	"The newspapers with the largest circulation, as identified by the Audit Bureau of Circulation, from each respective state, were used in the study"	4. Unknown	No controls	5. None	NA	1	12	24	12	12	578	578	578	Articles	Articles
1. First author	21	15	1997	Norris (1997)	Norris (1997)	1	1	1	Women Leaders Worldwide: A Splash of Color in the Photo Op	Chapter in book Women, Media, and Politics	4. Book chapter	Norris, P. (1997). ‘Women leaders worldwide: A splash of color in the photo op’, in: Norris, P. (eds.) Women, media, and politics. Oxford: Oxford University Press, 149-165.	121	Worldwide	4. Rest	Heads of government	Head of government	1. Executive	2. National	3. Both primary and general election	Differs per country studied	4. Other	.	.	.	.	1966-1995	1966	1995	.	3. Both	2. Automated content analysis	English language newspapers, news wires and news magazines. 8 sources in total.	1. Newspapers	"Eight sources were selected from the Lexis/Nexis data base to include English-language media with extensive coverage of international news, and with data for the whole period of the analysis. This included three newspapers, the New York Times, the Washington Post, and the Financial Times. The two largest wire services are included, namely, Associated Press and Reuters. The Economist and Newsweek…	4. Unknown	No controls	5. None	NA	10	.	20	10	8	133939	133939	10	Stories (which are articles for newspapers)	Paired politicians (10 pairs)
1. First author	22	16	1997	Carroll and Schreiber (1997)	Carroll and Schreiber (1997)	2	2	1	Media Coverage of Women in the 103rd Congress	Chapter in book Women, Media, and Politics	4. Book chapter	Carroll, S. J., & Schreiber, R. (1997). Media coverage of women in the 103rd Congress. Women, media, and politics, 131-148.	128	United States	1. United States	House/senate	House Representative/Senator	2. Legislative	2. National	1. General election	Plurality/Majority FPTP 1 435 435 FPTP (Electoral System Family | Electoral System for National Legislature | Number of tiers | Legislative size (directly elected) | Legislative size (Voting members) | Electoral system for the president | Source: www.idea.int )	1. Plurality/Majority	7.08	2.14	1.94	435	1993, 1994	1993	1994	11.0345	2. Routine	1. Manual content analysis	27 US newspapers, 'major papers' section in LexisNexis	1. Newspapers	Twenty-seven major newspapers throughout the United States in the months between January 1993 and October 1994. Two sets for analysis are constructued: one by searching for 'congresswomen' etc (N articles=291); and another one by searching the names of the 24 new female house members and the names of 51 male house members from the same states as the women (N articles unclear). The second set is t…	4. Unknown	No controls. Note: more visible period for women, because 1992 'Year of the Woman'	5. None	NA	1	0	75	24	27	.	.	.	Articles, or mentions of names (which can occur multiple times in one article.	Name mentions per person per year.
1. First author	23	17	2013	Dunaway et al. (2013)	Dunaway et al. (2013)	3	4	1	Traits versus Issues: How Female Candidates Shape Coverage of Senate and Gubernatorial Races	Political Research Quarterly	1. Journal article	Dunaway, J., Lawrence, R. G., Rose, M., & Weber, C. R. (2013). Traits versus issues: How female candidates shape coverage of senate and gubernatorial races. Political Research Quarterly, 66(3), 715-726.	38	United States	1. United States	Senate, governor		3. Executive and legislative	5. Combination of federal, national and/or sub-national level	1. General election	Plurality/Majority FPTP 1 435 435 FPTP (Electoral System Family | Electoral System for National Legislature | Number of tiers | Legislative size (directly elected) | Legislative size (Voting members) | Electoral system for the president | Source: www.idea.int )	1. Plurality/Majority	1.57	2.1	1.99	435	2006, 2008	2006	2008	16.3	1. Campaign	1. Manual content analysis	Local newspapers, multiple per state. "We use an electronic searchable newspaper archive called America’s Newspapers, provided by Newsbank, Inc., which contains an extensive archive of more than 400 local newspapers across the United States, including nearly every newspaper identified by the Editor and Publisher International Yearbook."	1. Newspapers	280 different local newspapers	4. Unknown	Type of office (Senator/governor), competitiveness, open seat, incumbency years, days till election, midterm, ownership newspaper, circulation newspaper.	2. Incumbency, competitiveness, standing in the poll, type of seat, party, etc.	NA	1	30	60	10	280	9725	9725	8744	Content analyzed newspaper articles	Articles within race (accounting for the clustering). Level of comparison is the race, not the candidate, comparing races with at least one women (2 female-female and 8 female-male races) with only men (21 male-male races). 21 MM races, 8 FM races, 2 FF races.
1. First author	24	18	2007	Semetko and Boomgaarden (2007)	Semetko and Boomgaarden (2007)	1	2	1	Reporting Germany's 2005 Bundestag election campaign: Was gender an issue?	International Journal of Press/Politics	1. Journal article	Semetko, H. A., & Boomgaarden, H. G. (2007). Reporting Germany's 2005 Bundestag election campaign: Was gender an issue?. Harvard International Journal of Press/Politics, 12(4), 154-171.	45	Germany	2. Europe	Party leaders	Party leader	2. Legislative	2. National	1. General election	Mixed MMP(FPTP and List PR) 2 614 614 Not applicable (Electoral System Family | Electoral System for National Legislature | Number of tiers | Legislative size (directly elected) | Legislative size (Voting members) | Electoral system for the president | Source: www.idea.int )	2. Mixed Member Proportional	2.16	4.46	4.05	614	2005	2005	2005	31.8	1. Campaign	1. Manual content analysis	In study both TV and newspaper, but results presented seperately, so we coded them seperately as well. TV (4 main evening newscasts) and one tabloid (Bild, first two pages) in six weeks leading to the election. "the four most-highly rated German public and commercial television main evening newscasts on networks ARD (tagesschau, 8:15 P.M.), ZDF (heute, 7 P.M.), Sat.1 (news, 6:30 P.M.), and RTL (a…	2. TV	NA	9. Not applicable	No controls	5. None	Angela Merkel	1	1	2	1	4	1904	1904	1904	Television news items	Averages and means over television news items are presented
1. First author	25	18	2007	Semetko and Boomgaarden (2007)	Semetko and Boomgaarden (2007)	1	2	1	Reporting Germany's 2005 Bundestag election campaign: Was gender an issue?	International Journal of Press/Politics	1. Journal article	Semetko, H. A., & Boomgaarden, H. G. (2007). Reporting Germany's 2005 Bundestag election campaign: Was gender an issue?. Harvard International Journal of Press/Politics, 12(4), 154-171.	45	Germany	2. Europe	Party leaders	Party leader	2. Legislative	2. National	1. General election	Mixed MMP(FPTP and List PR) 2 614 614 Not applicable (Electoral System Family | Electoral System for National Legislature | Number of tiers | Legislative size (directly elected) | Legislative size (Voting members) | Electoral system for the president | Source: www.idea.int )	2. Mixed Member Proportional	2.16	4.46	4.05	614	2005	2005	2005	31.8	1. Campaign	1. Manual content analysis	In study both TV and newspaper, but results presented seperately, so we coded them seperately as well. TV (4 main evening newscasts) and one tabloid (Bild, first two pages) in six weeks leading to the election. "the four most-highly rated German public and commercial television main evening newscasts on networks ARD (tagesschau, 8:15 P.M.), ZDF (heute, 7 P.M.), Sat.1 (news, 6:30 P.M.), and RTL (a…	1. Newspapers	Bild, Germany’s biggest tabloid newspaper, which sells approximately 4.5 million copies daily and reaches about one-quarter of the population on an average day. All items on the first two pages of Bild were coded.	2. Tabloid	No controls	5. None	Angela Merkel	1	1	2	1	1	1254	1254	1254	Articles	Averages and means over articles are presented
1. First author	26	18	2007	Semetko and Boomgaarden (2007)	Semetko and Boomgaarden (2007)	1	2	1	Reporting Germany's 2005 Bundestag election campaign: Was gender an issue?	International Journal of Press/Politics	1. Journal article	Semetko, H. A., & Boomgaarden, H. G. (2007). Reporting Germany's 2005 Bundestag election campaign: Was gender an issue?. Harvard International Journal of Press/Politics, 12(4), 154-171.	45	Germany	2. Europe	MPs	MP	2. Legislative	2. National	1. General election	Mixed MMP(FPTP and List PR) 2 614 614 Not applicable (Electoral System Family | Electoral System for National Legislature | Number of tiers | Legislative size (directly elected) | Legislative size (Voting members) | Electoral system for the president | Source: www.idea.int )	2. Mixed Member Proportional	2.16	4.46	4.05	614	2005	2005	2005	31.8	1. Campaign	1. Manual content analysis	In study both TV and newspaper, but results presented seperately, so we coded them seperately as well. TV (4 main evening newscasts) and one tabloid (Bild, first two pages) in six weeks leading to the election. "the four most-highly rated German public and commercial television main evening newscasts on networks ARD (tagesschau, 8:15 P.M.), ZDF (heute, 7 P.M.), Sat.1 (news, 6:30 P.M.), and RTL (a…	2. TV	NA	9. Not applicable	No controls	5. None	NA	1	.	598-1500 (extremely rough estimate, any political actor is coded, number of political actors in Germany is unclear, there were 598 seats in the Bundestag)	.	4	1904	1904	1904	Television news items	Averages and means over television news items are presented
1. First author	27	18	2007	Semetko and Boomgaarden (2007)	Semetko and Boomgaarden (2007)	1	2	1	Reporting Germany's 2005 Bundestag election campaign: Was gender an issue?	International Journal of Press/Politics	1. Journal article	Semetko, H. A., & Boomgaarden, H. G. (2007). Reporting Germany's 2005 Bundestag election campaign: Was gender an issue?. Harvard International Journal of Press/Politics, 12(4), 154-171.	45	Germany	2. Europe	MPs	MP	2. Legislative	2. National	1. General election	Mixed MMP(FPTP and List PR) 2 614 614 Not applicable (Electoral System Family | Electoral System for National Legislature | Number of tiers | Legislative size (directly elected) | Legislative size (Voting members) | Electoral system for the president | Source: www.idea.int )	2. Mixed Member Proportional	2.16	4.46	4.05	614	2005	2005	2005	31.8	1. Campaign	1. Manual content analysis	In study both TV and newspaper, but results presented seperately, so we coded them seperately as well. TV (4 main evening newscasts) and one tabloid (Bild, first two pages) in six weeks leading to the election. "the four most-highly rated German public and commercial television main evening newscasts on networks ARD (tagesschau, 8:15 P.M.), ZDF (heute, 7 P.M.), Sat.1 (news, 6:30 P.M.), and RTL (a…	1. Newspapers	Bild, Germany’s biggest tabloid newspaper, which sells approximately 4.5 million copies daily and reaches about one-quarter of the population on an average day. All items on the first two pages of Bild were coded.	2. Tabloid	No controls	5. None	NA	1	.	598-1500 (extremely rough estimate, any political actor is coded, number of political actors in Germany is unclear, there were 598 seats in the Bundestag)	.	1	1254	1254	1254	Articles	Averages and means over articles are presented
1. First author	28	19	2015	Hooghe, Jacobs and Claes (2015)	Hooghe et al. (2015)	2	3	0	Enduring Gender Bias in Reporting on Political Elite Positions: Media Coverage of Female MPs in Belgian News Broadcasts (2003-2011)	International Journal of Press/Politics	1. Journal article	Hooghe, M., Jacobs, L., & Claes, E. (2015). Enduring Gender Bias in Reporting on Political Elite Positions: Media Coverage of Female MPs in Belgian News Broadcasts (2003–2011). The International Journal of Press/Politics, 20(4), 395-414.	16	Belgium (Flanders)	2. Europe	MPs	MP	2. Legislative	3. Sub-national (state, regional or provincial)	1. General election	PR List PR 1 150 150 Not applicable (Electoral System Family | Electoral System for National Legislature | Number of tiers | Legislative size (directly elected) | Legislative size (Voting members) | Electoral system for the president | Source: www.idea.int )	3. Proportional Representation	5.16	8.84	7.03	150	2003, 2004, 2005, 2006, 2007, 2008, 2009, 2010, 2011	2003	2011	35.3	3. Both	1. Manual content analysis	TV news on main public broadcaster and main commercial broadcaster. The authors "rely on data collected by the Electronic News Archive (ENA) (www.nieuwsarchief. be)." which contains "information on name, language, function, sex, and speaking time of the depicted actor"	2. TV	NA	9. Not applicable	Age, position, experience, opposition, term. Note: not controlled for length of tenure of the MP, while two legislative periods of unequal length and with unequal share of female politicians is taken into account. One of the authors said in personal communication with DvdP that a robustnesstest was performed to see whether this drove the results, and that it did not.	2. Incumbency, competitiveness, standing in the poll, type of seat, party, etc.	NA	1	2	493	about 150-170	2	.	.	1011	Television items	493 individual MPs with separate observations for every function they perform, unit of observation is MP-function (N=1,011). Functions may be "Ordinary MP", "party president, "Speaker", etc. "We opted to include political position, parliamentary term, and membership of a majority or opposition party in our definition of a “distinct observation.”"
1. First author	29	20	2013	Vos (2013)	Vos (2013)	1	1	1	The vertigal glass ceiling: Explaining female politicians' underrepresentation in television news	The European Journal of Communication Research	1. Journal article	Vos, Debby. (2013). ‘The vertical glass ceiling: Explaining female politicians' underrepresentation in television news’, Communications (38) 389-410.	17	Belgium (Flanders)	2. Europe	MPs, ministers, party leaders	MP, minister, party leader	3. Executive and legislative	3. Sub-national (state, regional or provincial)	1. General election	PR List PR 1 150 150 Not applicable (Electoral System Family | Electoral System for National Legislature | Number of tiers | Legislative size (directly elected) | Legislative size (Voting members) | Electoral system for the president | Source: www.idea.int )	3. Proportional Representation	5.16	8.84	7.03	150	2003, 2004, 2005, 2006, 2007, 2008, 2009, 2010	2003	2010	35.3	3. Both	1. Manual content analysis	TV news on main public broadcaster and main commercial broadcaster. The author uses the coding by the "Electronic News Archive (ENA), an extensive and complete dataset of Flemish television news that codes all 7pm-news broadcasts from VTM (commercial broadcaster) and VRT (public broadcaster) from 2003 onwards."	2. TV	NA	9. Not applicable	Age, incumbency, position, experience, position on electoral list, senate candidate.	2. Incumbency, competitiveness, standing in the poll, type of seat, party, etc.	NA	1	2	360	127	2	108000	108000	360	Television items	Politicians
1. First author	30	21	2012	Ross and Comrie (2012)	Ross and Comrie (2012)	2	2	1	The rules of the (leadership) game: Gender, politics and news	Journalism	1. Journal article	Ross, K., & Comrie, M. (2012). The rules of the (leadership) game: Gender, politics and news. Journalism, 13(8), 969-984.	36	New Zealand	3. Other English speaking country	Party leaders	Party leader	2. Legislative	2. National	1. General election	Mixed MMP(FPTP and Party Lists) 3 122 122 Not applicable (Electoral System Family | Electoral System for National Legislature | Number of tiers | Legislative size (directly elected) | Legislative size (Voting members) | Electoral system for the president | Source: www.idea.int)	2. Mixed Member Proportional	3.84	3.07	2.78	122	2008	2008	2008	33.6	1. Campaign	1. Manual content analysis	In study both TV and newspaper, but results presented seperately, so we coded them seperately as well. "The TV sample comprised the two early evening news programmes broadcast on publicly owned TVNZ (One News) and privately owned TV3 (3 News)."	2. TV	NA	9. Not applicable	No controls	5. None	Helen Clark	1	1	2	1	2	194	194	194	Television items	Television items
1. First author	31	21	2012	Ross and Comrie (2012)	Ross and Comrie (2012)	2	2	1	The rules of the (leadership) game: Gender, politics and news	Journalism	1. Journal article	Ross, K., & Comrie, M. (2012). The rules of the (leadership) game: Gender, politics and news. Journalism, 13(8), 969-984.	36	New Zealand	3. Other English speaking country	Party leaders		2. Legislative	2. National	1. General election	Mixed MMP(FPTP and Party Lists) 3 122 122 Not applicable (Electoral System Family | Electoral System for National Legislature | Number of tiers | Legislative size (directly elected) | Legislative size (Voting members) | Electoral system for the president | Source: www.idea.int)	2. Mixed Member Proportional	3.84	3.07	2.78	122	2008	2008	2008	33.6	1. Campaign	1. Manual content analysis	In study both TV and newspaper, but results presented seperately, so we coded them seperately as well.	1. Newspapers	"We monitored the two most widely distributed and largest circulation newspapers, the New Zealand Herald and the Dominion Post" "151 articles were selected for analysis, 93 from the New Zealand Herald (62%) and 58 from the Dominion Post (38%)."	4. Unknown	No controls	5. None	Helen Clark	1	1	2	1	2	151	151	151	Articles	Articles
1. First author	32	22	2011	Midtbø (2011)	Midtbø (2011)	0	1	0	Explaining Media Attention for Norwegian MPs: A New Modelling Approach	Scandinavian Political Studies	1. Journal article	Midtbø, T. (2011). Explaining media attention for Norwegian MPs: A new modelling approach. Scandinavian Political Studies, 34(3), 226-249.	41	Norway	2. Europe	MPs	MP	2. Legislative	2. National	4. Not applicable, routine times	PR List PR 2 169 169 Not applicable (Electoral System Family | Electoral System for National Legislature | Number of tiers | Legislative size (directly elected) | Legislative size (Voting members) | Electoral system for the president | Source: www.idea.int)	3. Proportional Representation	3.31	6.18	5.35	165	2001, 2002, 2003, 2004, 2005	2001	2005	35.8	2. Routine	3. Combination of manual and automatic content analysis	14 newspapers	1. Newspapers	"An electronic media archive, A-tekst, was used to identify and retrieve the newspaper articles (http://www.retriever-info.com/ no, accessed April 2009). Searching for the names of the parliamentarians was limited to headlines and abstracts, but articles were examined in their entirety in order to categorise the content"	4. Unknown	party leader, socialist, opposition, age, experience, legislative activity, worked as journalist, tabloid paper, etc.	2. Incumbency, competitiveness, standing in the poll, type of seat, party, etc.	NA	1	0	153	.	14	18144	18144	153; 18144	Newspaper articles	Articles by politician in multilevel analysis
1. First author	33	23	2013	Ross, Evans, Harrison, Shears and Wadia (2013)	Ross et al. (2013)	5	5	1	The Gender of News and the News of Gender: A Study of Sex, Politics, and Press Coverage of the 2010 British General Election	International Journal of Press/Politics	1. Journal article	Ross, K., Evans, E., Harrison, L., Shears, M., & Wadia, K. (2013). The gender of news and news of gender: a study of sex, politics, and press coverage of the 2010 British General Election. The International Journal of Press/Politics, 18(1), 3-20.	57	United Kingdom	2. Europe	MPs	MP	2. Legislative	2. National	1. General election	Plurality/Majority FPTP 1 650 650 Not applicable (Electoral System Family | Electoral System for National Legislature | Number of tiers | Legislative size (directly elected) | Legislative size (Voting members) | Electoral system for the president | Source: www.idea.int)	1. Plurality/Majority	15.13	3.72	2.57	650	2010	2010	2010	22	1. Campaign	1. Manual content analysis	Newspapers: six national dailies, and five Sunday titles. Only articles that focus on candidate as candidate.	1. Newspapers	"Our sample comprised six national dailies, selected on the basis of circulation and broad political orientation: Independent, Guardian, and Times for the broadsheet (quality) press and the Daily Express, Sun, and Mirror representing the midmarket and tabloid (popular) press. In addition, five Sunday titles were also monitored: Observer, Independent on Sunday, Sunday Times, Sunday Express, and Su…	3. Both	For some measure separate analyses for the leaders, government etc. Analyses not per candidate.	5. None	NA	1	1	650-4134 (any article that mentioned any candidate as a candidate were selected, there were 4,134 candidates. Arguably, the number of MPs (650) could also be used)	.	11	381	381	381	Newspaper articles	Mentions and articles.
1. First author	34	24	2008	Van Aelst, Maddens, Noppe and Fiers (2008)	Van Aelst et al. (2008)	0	4	0	Politicians in the News: Media or Party Logic? Media Attention and Electoral Success in the Belgian Election Campaign of 2003	European Journal of Communication	1. Journal article	Van Aelst , P., Maddens, B., Noppe, J., & Fiers, S. (2008). Politicians in the news: Media or party logic? Media attention and electoral success in the Belgian election campaign of 2003. European Journal of Communication, 23(2), 193-210.	149	Belgium	2. Europe	Party leaders, MPs	Party leader, MP	2. Legislative	3. Sub-national (state, regional or provincial)	1. General election	PR List PR 1 150 150 Not applicable (Electoral System Family | Electoral System for National Legislature | Number of tiers | Legislative size (directly elected) | Legislative size (Voting members) | Electoral system for the president | Source: www.idea.int )	3. Proportional Representation	5.16	8.84	7.03	150	2003	2003	2003	35.3	1. Campaign	1. Manual content analysis	TV and Newspapers, here the results on TV are discussed. "The television coverage is measured by counting the appearances of a candidate in the evening news broadcasts of both the public and the commercial channels." "The data were gathered by the Electronic News Archive (ENA), a cooperation of the Universities of Antwerp and Leuven."	2. TV	NA	9. Not applicable	Party, senate candidate, minister function, local mandate, position on list, campaignspending	2. Incumbency, competitiveness, standing in the poll, type of seat, party, etc.	NA	1	1	948	.	2	min 877	min 877	948	TV stories	Candidates
1. First author	35	24	2008	Van Aelst, Maddens, Noppe and Fiers (2008)	Van Aelst et al. (2008)	0	4	0	Politicians in the News: Media or Party Logic? Media Attention and Electoral Success in the Belgian Election Campaign of 2003	European Journal of Communication	1. Journal article	Van Aelst , P., Maddens, B., Noppe, J., & Fiers, S. (2008). Politicians in the news: Media or party logic? Media attention and electoral success in the Belgian election campaign of 2003. European Journal of Communication, 23(2), 193-210.	149	Belgium	2. Europe	Party leaders, MPs	Party leader, MP	2. Legislative	3. Sub-national (state, regional or provincial)	1. General election	PR List PR 1 150 150 Not applicable (Electoral System Family | Electoral System for National Legislature | Number of tiers | Legislative size (directly elected) | Legislative size (Voting members) | Electoral system for the president | Source: www.idea.int )	3. Proportional Representation	5.16	8.84	7.03	150	2003	2003	2003	35.3	1. Campaign	1. Manual content analysis	TV and Newspapers, here the results on newspapers are discussed. "The newspaper coverage is measured by counting the number of articles (in the eight Dutch-language newspapers) in which the candidate is mentioned at least once" "The data were gathered on the basis of Mediargus, an electronic news archive that contains all articles of all eight Flemish newspapers."	1. Newspapers	"The eight newspapers are: De Standaard, De Morgen, De Tijd, Het Laatste Nieuws, De Gazet van Antwerpen, Het Volk, Het Belang van Limburg and Het Nieuwsblad."	4. Unknown	Party, senate candidate, minister function, local mandate, position on list, campaignspending	2. Incumbency, competitiveness, standing in the poll, type of seat, party, etc.	NA	1	1	948	.	8	min 20600	min 20600	948	Newspaper articles	Candidates
1. First author	36	25	2013	Dan and Iorgoveanu (2013)	Dan and Iorgoveanu (2013)	2	2	1	Still On the Beaten Path: How Gender Impacted the Coverage of Male and Female Romanian Candidates for European Office	International Journal of Press/Politics	1. Journal article	Dan, V., & Iorgoveanu, A. (2013). Still on the beaten path: How gender impacted the coverage of male and female Romanian candidates for European Office. The International Journal of Press/Politics, 18(2), 208-233.	15	Romania	2. Europe	European parliament	MEP	2. Legislative	1. Supranational	1. General election	Proportional representation (Party Lists and Single Transferable Vote depending on country)	3. Proportional Representation	3.32	3.93	3.6	334	2009	2009	2009	11.4	1. Campaign	1. Manual content analysis	Newspapers, articles on the websites of four broadsheets and tabloids	1. Newspapers	News stories from the web sites of the most influential broadsheets and tabloids in Romania, namely, Cancan, Evenimentul Zilei, Gândul, and Libertatea.	3. Both	No controls	5. None	NA	1	1	4	2	4	249	249	.	Newspaper web articles	Articles by candidate
1. First author	37	26	1999	Gidengil and Everitt (1999)	Gidengil and Everitt (1999)	2	2	1	Metaphors and Misrepresentation. Gendered Mediation in News Coverage of the 1993 Canadian Leaders' Debates	International Journal of Press/Politics	1. Journal article	Gidengil, E., & Everitt, J. (1999). Metaphors and misrepresentation: Gendered mediation in news coverage of the 1993 Canadian leaders' debates. Harvard International Journal of Press/Politics, 4(1), 48-65.	87	Canada	3. Other English speaking country	Nat. Party Leaders		2. Legislative	2. National	1. General election	Plurality/Majority FPTP 1 338 338 Not applicable (Electoral System Family | Electoral System for National Legislature | Number of tiers | Legislative size (directly elected) | Legislative size (Voting members) | Electoral system for the president | Source: www.idea.int)	1. Plurality/Majority	17.67	3.93	2.35	295	1993	1993	1993	13.3	1. Campaign	1. Manual content analysis	TV news on two broadcasters (one public one private) about 2 TV debates (one French, one English)	2. TV	NA	9. Not applicable	Coverage in the media is compared to confrontational behavior by politicians in the two TV debates. Confrontational behavior is measured using five indicators (using 'you', mentioning opponents by name, interrupting, finger-pointing and fist-clenching)	1. Candidate's own campaign messages / communication	NA	1	1	5	2	2	.	275	.	Metaphors	Percentages of types of metaphor by politician
1. First author	38	27	2000	Gidengil and Everitt (2000)	Gidengil and Everitt (2000)	2	2	1	Filtering the female. Television news coverage of the 1993 Canadian leaders’ debates	Women & Politics	1. Journal article	Gidengil, E., & Everitt, J. (2000). Filtering the female: Television news coverage of the 1993 Canadian leaders' debates. Women & Politics, 21(4), 105-131.	57	Canada	3. Other English speaking country	Nat. Party Leaders	Party leader	2. Legislative	2. National	1. General election	Plurality/Majority FPTP 1 338 338 Not applicable (Electoral System Family | Electoral System for National Legislature | Number of tiers | Legislative size (directly elected) | Legislative size (Voting members) | Electoral system for the president | Source: www.idea.int)	1. Plurality/Majority	17.67	3.93	2.35	295	1993	1993	1993	13.3	1. Campaign	1. Manual content analysis	TV news on two broadcasters (one public one private) about 2 TV debates (one French, one English). For the analysis on interpretive reporting of both debates is used, for the analysis on sound bites only coverage of the English language debate is used.	2. TV	NA	9. Not applicable	Soundbites compared with own behavior	1. Candidate's own campaign messages / communication	NA	1	1	5	2	2	27	.	.	Sentence and soundbite	Percentages per politician
1. First author	39	28	2003	Gidengil and Everitt (2003a)	Gidengil and Everitt (2003a)	2	2	1	Conventional Coverage / Unconventional Politicians: Gender and Media Coverage of Canadian Leaders' Debates	Canadian Journal of Political Science	1. Journal article	Gidengil, E., & Everitt, J. (2003a). Conventional coverage/unconventional politicians: Gender and media coverage of Canadian leaders' debates, 1993, 1997, 2000. Canadian Journal of Political Science/Revue canadienne de science politique, 36(3), 559-577.	95	Canada	3. Other English speaking country	Nat. Party Leaders		2. Legislative	2. National	1. General election	Plurality/Majority FPTP 1 338 338 Not applicable (Electoral System Family | Electoral System for National Legislature | Number of tiers | Legislative size (directly elected) | Legislative size (Voting members) | Electoral system for the president | Source: www.idea.int)	1. Plurality/Majority	17.67	3.93	2.35	295	1993, 1997, 2000	1993	2000	13.3	1. Campaign	1. Manual content analysis	TV news on two broadcasters (one public one private) about TV debates.	2. TV	NA	9. Not applicable	Coverage in the media is compared to confrontational behavior by politicians in the two TV debates. Confrontational behavior is measured using five indicators (using 'you', mentioning opponents by name, interrupting, finger-pointing and fist-clenching)	1. Candidate's own campaign messages / communication	NA	1	3	10	3	2	.	.	.	Metaphors	Percentages of types of metaphor by politician
1. First author	40	29	2003	Gidengil and Everitt (2003b)	Gidengil and Everitt (2003b)	2	2	1	Talking tough: gender and reported speech in campaign news coverage	Political Communication	1. Journal article	Gidengil, E., & Everitt, J. (2003b). Talking tough: Gender and reported speech in campaign news coverage. Political Communication, 20(3), 209-232.	141	Canada	3. Other English speaking country	Nat. Party Leaders		2. Legislative	2. National	1. General election	Plurality/Majority FPTP 1 338 338 Not applicable (Electoral System Family | Electoral System for National Legislature | Number of tiers | Legislative size (directly elected) | Legislative size (Voting members) | Electoral system for the president | Source: www.idea.int)	1. Plurality/Majority	17.67	3.93	2.35	295	1993, 1997	1993	1997	13.3	1. Campaign	1. Manual content analysis	TV news on two broadcasters (one public one private) about TV debates.	2. TV	NA	9. Not applicable	No controls	5. None	NA	1	2	8	3	2	.	1338	.	Verbs for reported speech (e.g. 'says')	Verbs by sex; in some analyses leaders
1. First author	41	30	2003	Everitt (2003)	Everitt (2003)	1	1	1	Media in the Maritimes: Do Female Candidates Face a Bias?	Atlantis	1. Journal article	Everitt, J. (2003). Media in the Maritimes: Do female candidates face a bias?. Atlantis: Critical Studies in Gender, Culture & Social Justice, 27(2), 90-98.	29	Canada	3. Other English speaking country	Provinces	MP (provincial)	2. Legislative	3. Sub-national (state, regional or provincial)	1. General election	Plurality/Majority PFTP, source: https://en.wikipedia.org/wiki/Elections_in_Canada	1. Plurality/Majority	13.56	3.77	2.54	301	1999, 2000	1999	2000	20.6	1. Campaign	1. Manual content analysis	Newspapers (6)	1. Newspapers	six Maritime newspapers. The coverage of the 1999 New Brunswick election is drawn from the Telegraph Journal, the Times Globe and the Daily Gleaner. For coverage of the 1999 Nova Scotia election the analysis focuses on articles found in the Halifax Chronicle Herald and the Cape Breton Post. The Guardian is the source for the analysis of the coverage of the 2000 PEI election.	4. Unknown	Analysis with and without party leaders	5. None	NA	1	3	457	About 75 (very rough estimate)	6	3212	3212	.	Newspaper articles	Percentages by sex
1. First author	42	31	2007	Trimble (2007)	Trimble (2007)	1	1	1	Gender, Political Leadership and Media Visibility: Globe and Mail Coverage of Conservative Party of Canada Leadership Contests	Canadian Journal of Political Science	1. Journal article	Trimble, L. (2007). Gender, political leadership and media visibility: Globe and Mail coverage of Conservative Party of Canada leadership contests. Canadian Journal of Political Science/Revue canadienne de science politique, 40(4), 969-993.	43	Canada	3. Other English speaking country	Party leader contest (primary of conservative party)	Party leader (primary)	4. Other	2. National	2. Primary election	Plurality/Majority FPTP 1 338 338 Not applicable (Electoral System Family | Electoral System for National Legislature | Number of tiers | Legislative size (directly elected) | Legislative size (Voting members) | Electoral system for the president | Source: www.idea.int)	1. Plurality/Majority	9.86	2.96	2.38	264	1976, 1993, 2004	1976	2004	.	1. Campaign	1. Manual content analysis	Newsaper (1)	1. Newspapers	Globe and Mail. "The Globe and Mail was chosen as the news source for this study because it has covered Canadian politics since 1844, maintains a large nationwide readership, and has a well-recognized and undisputed agenda-setting role among the Canadian media"	1. Broadsheet / quality	All same party, so controlled for party by design, ballot position taken into account	2. Incumbency, competitiveness, standing in the poll, type of seat, party, etc.	NA	1	3	11	3	1	471	471	471	Articles	Articles
1. First author	43	32	2010	Wagner (2010)	Wagner (2010)	1	1	1	On their best behaviour? Newspaper journalists' coverage of women municipal candidates in Alberta	Canadian Political Science Review	1. Journal article	Wagner, A. (2011). On their best behaviour? Newspaper journalists' coverage of women municipal candidates in Alberta. Canadian Political Science Review, 5(1), 38-54.	10	Canada	3. Other English speaking country	Municipal elections (for councillors, not mayoral candidates)	Municipal councillor	4. Other	4. Local	1. General election	Plurality/Majority FPTP. Apparently this method, but not completely certain. Source: https://en.wikipedia.org/wiki/Municipal_elections_in_Canada	1. Plurality/Majority	8.61	3.75	3.22	308	2007	2007	2007	21.3	1. Campaign	1. Manual content analysis	Newspapers (6)	1. Newspapers	"I selected the Tofield Mercury, Millet Pipestone Flyer, and St. Albert Gazette community newspapers as well as the small-circulation Red Deer Advocate, the medium-circulation Edmonton Sun, and the largecirculation Edmonton Journal daily newspapers"	4. Unknown	No controls, analyses also split out by newspaper and region	5. None	NA	1	6	98	25	6	182	182	182	Articles	Articles
1. First author	44	33	2015	Gattermann and Vasilopoulou (2015)	Gattermann and Vasilopoulou (2015)	2	2	1	Absent yet popular? Explaining news visibility of Members of the European Parliament	European Journal of Political Research	1. Journal article	Gattermann , K., & Vasilopoulou, S. (2015). Absent yet popular? Explaining news visibility of Members of the European Parliament. European Journal of Political Research, 54(1), 121-140.	28	EU: Britain, France, the Netherlands, Germany and Italy	2. Europe	European parliament	MEP	2. Legislative	1. Supranational	1. General election	Proportional representation (Party Lists and Single Transferable Vote depending on country)	3. Proportional Representation	.	.	.	.	2009, 2010, 2011	2009	2011	26.9	2. Routine	2. Automated content analysis	Newspapers	1. Newspapers	National broadsheets, two per country	1. Broadsheet / quality	legislative activity, legislative position, government participation, age, tenure, party size, country dummies, etc.	2. Incumbency, competitiveness, standing in the poll, type of seat, party, etc.	NA	5	0	302	About 100-120	10	.	.	7550	Mentions, weighing headline mentions more heavily	MEP per month, 302 MEPs times 25 months
1. First author	45	34	2015	Conroy, Oliver, Breckenridge-Jackson, and Heldman (2015)	Conroy et al. (2015)	3	4	1	From Ferraro to Palin: Sexism in Coverage of Vice Presidential Candidates in Old and New Media	Politics, Groups, and Identitties, special virtual issue.	1. Journal article	Conroy, M., Oliver, S., Breckenridge-Jackson, I., & Heldman, C. (2015). From Ferraro to Palin: sexism in coverage of vice presidential candidates in old and new media. Politics, Groups, and Identities, 3(4), 573-591.	10	United States	1. United States	Vice-presidents	Vice-president	1. Executive	2. National	1. General election	Plurality/Majority FPTP 1 435 435 FPTP (Electoral System Family | Electoral System for National Legislature | Number of tiers | Legislative size (directly elected) | Legislative size (Voting members) | Electoral system for the president | Source: www.idea.int )	1. Plurality/Majority	5.39	2.03	1.95	435	1984, 1988, 1992, 1996, 2000, 2004, 2008	1984	2008	5.05747	1. Campaign	1. Manual content analysis	Newspapers and blogs (latter only Palin). 'Major newspapers' in LexisNexis.	1. Newspapers	"The “major papers” ﬁlter of LexisNexis was used, which includes the top 57 circulated" Wire services were also included.	4. Unknown	Paired vice-presidents, controls for year, incumbent, democrat, sex of author.	2. Incumbency, competitiveness, standing in the poll, type of seat, party, etc.	NA	1	7	14	2	57	1769	1769	2076	Newspaper articles	Newspaper articles by candidate
1. First author	46	35	2010	Miller, Peake and Boulton (2010)	Miller et al. (2010)	2	3	1	Testing the Saturday Night Live Hypothesis: Fairness and Bias in Newspaper Coverage of Hillary Clinton's Presidential Campaign.	Politics & Gender	1. Journal article	Miller, M. K., Peake, J. S., & Boulton, B. A. (2010). Testing the Saturday Night Live hypothesis: Fairness and bias in newspaper coverage of Hillary Clinton's presidential campaign. Politics & Gender, 6(2), 169-198.	46	United States	1. United States	Presidential primary	Presidential nominee	1. Executive	2. National	2. Primary election	Plurality/Majority FPTP 1 435 435 FPTP (Electoral System Family | Electoral System for National Legislature | Number of tiers | Legislative size (directly elected) | Legislative size (Voting members) | Electoral system for the president | Source: www.idea.int )	1. Plurality/Majority	4.01	2.09	1.94	435	2008	2008	2008	17	1. Campaign	1. Manual content analysis	Newspapers	1. Newspapers	"Articles and editorials covering the 2008 presidential campaign were content-coded from the top-circulating newspaper in all states holding their Democratic nominating contest on or before Super Tuesday.2 The Washington Post and the Wall Street Journal were also included to represent leading newspapers of record, bringing the total number of newspapers to 25."	4. Unknown	No controls	5. None	Hillary Clinton	1	1	4	1	25	6600	6600	6600	Newspaper articles	Newspaper articles and newspaper articles by candidate.
1. First author	47	36	2010	Lawrence and Rose (2011)	Lawrence and Rose (2011)	2	2	1	Bringing Out the Hook: Exit Talk in Media Coverage of Hillary Clinton and Past Presidential Campaigns	Political Research Quarterly	1. Journal article	Lawrence, R. G., & Rose, M. (2011). Bringing out the hook: exit talk in media coverage of Hillary Clinton and past presidential campaigns. Political Research Quarterly, 64(4), 870-883.	13	United States	1. United States	Presidential primary		1. Executive	2. National	2. Primary election	Plurality/Majority FPTP 1 435 435 FPTP (Electoral System Family | Electoral System for National Legislature | Number of tiers | Legislative size (directly elected) | Legislative size (Voting members) | Electoral system for the president | Source: www.idea.int )	1. Plurality/Majority	9.67	2.02	1.79	435	1976, 1980, 1984, 1988, 2008	1976	2008	.	1. Campaign	1. Manual content analysis	1 Newspaper (New York Times)	1. Newspapers	New York Times, accessed through Nexis and electronic database of New York Times.	1. Broadsheet / quality	No formal controls, but some control by design: only runner-up candidates in primary races are included.	5. None	Hillary Clinton	1	5	5	1	1	5628	.	783	Paragraphs. 5628 newspaper articles are coded, of which 259 contain exit talk, totalling 783 paragraphs of exit talk.	Paragraphs and articles. Most analyses are within the set of paragraphs on exit talk, except in the beginning when the analyses give the share of exit talk relative to all articles.
1. First author	48	37	2009	Fowler and Lawless (2009)	Fowler and Lawless (2009)	2	2	1	Looking for Sex in All the Wrong Places: Press Coverage and the Electoral Fortunes of Gubernatorial Candidates	Perspectives on Politics	1. Journal article	Fowler, L. L., & Lawless, J. L. (2009). Looking for sex in all the wrong places: Press coverage and the electoral fortunes of gubernatorial candidates. Perspectives on Politics, 7(3), 519-536.	59	United States	1. United States	Governor	Governor	1. Executive	3. Sub-national (state, regional or provincial)	1. General election	Plurality/Majority FPTP 1 435 435 FPTP (Electoral System Family | Electoral System for National Legislature | Number of tiers | Legislative size (directly elected) | Legislative size (Voting members) | Electoral system for the president | Source: www.idea.int )	1. Plurality/Majority	7.89	2.08	1.91	435	1990, 1992, 1993, 1994, 1996, 1997	1990	1997	6.66667	1. Campaign	1. Manual content analysis	Newspapers	1. Newspapers	The data come from each state’s most widely distributed newspaper, accessed through Lexis-Nexus, Dialog, and microfiche.	4. Unknown	Party, candidate quality, open seat, proximity of general election, timing of primary, percentage women in state legislature, 'normal' percentage republican, length of article.	2. Incumbency, competitiveness, standing in the poll, type of seat, party, etc.	NA	1	27	54	27	27	1365	1365	2730	Newspaper articles	Newspaper articles by candidate
1. First author	49	38	2013	Lavery (2013)	Lavery (2013)	1	1	1	Gender Bias in the Media? An Examination of Local Television News Coverage of Male and Female House Candidates	Politics & Policy	1. Journal article	Lavery, L. (2013). Gender bias in the media? An examination of local television news coverage of male and female House candidates. Politics & Policy, 41(6), 877-910.	5	United States	1. United States	House	House representative	2. Legislative	2. National	1. General election	Plurality/Majority FPTP 1 435 435 FPTP (Electoral System Family | Electoral System for National Legislature | Number of tiers | Legislative size (directly elected) | Legislative size (Voting members) | Electoral system for the president | Source: www.idea.int )	1. Plurality/Majority	2	2.15	2	435	2002	2002	2002	13.8	1. Campaign	1. Manual content analysis	local TV news. "The data reported here are drawn from a content analysis of local news stations conducted by the University of Wisconsin Newslab in 2002.19 The Newslab began a systematic study of the content and effectiveness of local television news by recording and examining the highest rated, early evening (4:30 p.m.-7:30 p.m.) and late evening (9:00 p.m.-11:30 p.m.) local news broadcasts from…	2. TV	NA	9. Not applicable	Incumbency, party, media market. Interactions with gender: incumbency and party.	2. Incumbency, competitiveness, standing in the poll, type of seat, party, etc.	NA	1	95	172	39	122	752	752	752	TV story	Stories
1. First author	50	39	2012	Meeks (2012)	Meeks (2012)	1	1	1	Is she man enough? Women candidates, executive political offices, and news coverage	Journal of Communication	1. Journal article	Meeks, L. (2012). Is she “man enough”? Women candidates, executive political offices, and news coverage. Journal of Communication, 62(1), 175-193.	94	United States	1. United States	Senate, republican primary, democratic primary, govenor, vice president	Governor	3. Executive and legislative	5. Combination of federal, national and/or sub-national level	3. Both primary and general election	Plurality/Majority FPTP 1 435 435 FPTP (Electoral System Family | Electoral System for National Legislature | Number of tiers | Legislative size (directly elected) | Legislative size (Voting members) | Electoral system for the president | Source: www.idea.int )	1. Plurality/Majority	2.71	2.21	2.01	435	1999, 2000, 2002, 2004, 2006, 2007, 2008	1999	2008	13.3	1. Campaign	1. Manual content analysis	Newspapers.	1. Newspapers	The two largest circulation newspapers in the respective candidate’s state, both serving different, large metropolitan areas. "The eight newspapers were: the Charlotte Observer and News & Observer for Dole; the St. Louis Post-Dispatch and Kansas City Star for McCaskill; the New York Daily News and Buffalo News for Clinton; and the Anchorage Daily News and Fairbanks Daily News-Miner for Palin." "F…	4. Unknown	Executive/legislative office, some control for party by design	5. None	NA	1	8	12	4	8	706	706	706	Newspaper articles	Articles by candidate (percentage of articles)
1. First author	51	40	2009	Valenzuela and Correa (2009)	Valenzuela and Correa (2009)	1	2	0	Press coverage and public opinion on women candidates. The Case of Chile’s Michelle Bachelet	The International Communication Gazette	1. Journal article	Valenzuela, S., & Correa, T. (2009). Press coverage and public opinion on women candidates: The case of Chile's Michelle Bachelet. International Communication Gazette, 71(3), 203-223.	37	Chile	4. Rest	President		1. Executive	2. National	1. General election	Majority/Plurality TRS Two-Round System Whole country: PR List PR 1 120 120 TRS (Electoral System Family | Electoral System for National Legislature | Number of tiers | Legislative size (directly elected) | Legislative size (Voting members) | Electoral system for the president | Source: www.idea.int) "The winning presidential candidate must earn an absolute majority of valid votes. If no candidat…	1. Plurality/Majority	7.08	2.36	2.02	120	2005, 2006	2005	2006	15	1. Campaign	1. Manual content analysis	Newspapers	1. Newspapers	Three prominent Chilean newspapers, El Mercurio, La Tercera and Las Últimas Noticias	3. Both	Gender of the reporter	4. Other	Michelle Bachelet	1	1	4	1	3	349	349	349	Newspaper articles	"The unit of analysis was the individual article, including news stories, feature stories, interviews, editorials, opinion columns, letters to the editor and picture captions."
1. First author	52	41	1999	Rausch, Rozell and Wilson (1999)	Rausch et al. (1999)	3	3	0	When Women Lose: A Study of Media Coverage of Two Gubernatorial Campaigns	Women & Politics	1. Journal article	Rausch, J. D., Rozell, M. J., & Wilson, H. L. (1999). When women lose: A study of media coverage of two gubernatorial campaigns. Women & Politics, 20(4), 1-21.	32	United States	1. United States	Governor	Governor	1. Executive	3. Sub-national (state, regional or provincial)	1. General election	Plurality/Majority FPTP 1 435 435 FPTP (Electoral System Family | Electoral System for National Legislature | Number of tiers | Legislative size (directly elected) | Legislative size (Voting members) | Electoral system for the president | Source: www.idea.int )	1. Plurality/Majority	7.08	2.14	1.94	435	1993, 1996	1993	1996	11.0345	1. Campaign	1. Manual content analysis	Newspapers	1. Newspapers	4-5 local newspapers per state."five Virginia newspapers and four West Virginia newspapers for the periods beginning September 1 of each election year and ending on election day. The newspapers examined for this analysis were selected for a combination of their geographic distribution, circulation, influence, and presence within a newspaper chain."	4. Unknown	Only informally comparing with staning in polls and own campaign (p13: "Allen [m] ran a great campaign, and Terry [f] ran a miserable one, the most compelling reason for the different coverage they received").	5. None	NA	1	2	4	2	9	643	643	269; 356	Newspaper articles	Newspaper articles per race
1. First author	53	42	1995	Gingras (1995)	Gingras (1995)	0	1	0	Daily male delivery: Women and politics in the daily newspapers	Chapter in book Gender and politics in contemporary Canada	4. Book chapter	Gingras, F. P. (1995). Daily male delivery: Women and politics in the daily newspapers. Gender and politics in contemporary Canada, ed. Francois Pierre Gingras. Toronto: Oxford University Press	15	Canada	3. Other English speaking country	Any (all political news)		3. Executive and legislative	5. Combination of federal, national and/or sub-national level	4. Not applicable, routine times	Plurality/Majority FPTP 1 338 338 Not applicable (Electoral System Family | Electoral System for National Legislature | Number of tiers | Legislative size (directly elected) | Legislative size (Voting members) | Electoral system for the president | Source: www.idea.int)	1. Plurality/Majority	17.67	3.93	2.35	295	1991	1991	1991	13.3	2. Routine	1. Manual content analysis	Newspapers: three daily newspapers	1. Newspapers	Three daily newspapers in the very politically aware National Capatial Region (the Citizen, Le Droit, and the Ottowa Sun) [..] about 50 consequtive issues of each. The sample consisted of all issues during nine consequtive weeks	4. Unknown	No controls	5. None	NA	1	0	.	.	3	3662	3662	.	Articles	Percentages of articles within the ' field' politics (one in five fields coded)
2. Second author	54	43	2001	Miller (2001)	Miller (2001)	1	1	1	Newspaper coverage and gender: An analysis of the 1996 Illinois state legislative house district races	Women & Politics	1. Journal article	Miller, G. (2001). Newspaper coverage and gender: An analysis of the 1996 Illinois state legislative house district races. Women & Politics, 22(3), 83-100.	15	United States	1. United States	House (state level)	House Representative (state level)	2. Legislative	3. Sub-national (state, regional or provincial)	1. General election	Plurality/Majority FPTP 1 435 435 FPTP (Electoral System Family | Electoral System for National Legislature | Number of tiers | Legislative size (directly elected) | Legislative size (Voting members) | Electoral system for the president | Source: www.idea.int )	1. Plurality/Majority	3.21	2.18	2	435	1996	1996	1996	11.4943	1. Campaign	1. Manual content analysis	Newspapers	1. Newspapers	All newspaper articles from the Illinois Press Association, including the dailies and weeklies on state level.	4. Unknown	no controls (in some cases means splitt out by incumbency status)	5. None	NA	1	21	42	.	.	626	2086	2086	Paragraphs within newspaper articles. Probably paragraphs can be coded for both candidates if both are mentioned.	Paragraphs
2. Second author	55	44	1998	Serini, Powers and Johnson (1998)	Serini et al. (1998)	3	3	1	Of horse race and policy issues: A study of gender in coverage of a gubernatorial election by two major metropolitan newspapers	Journalism & Mass Communication Quarterly	1. Journal article	Serini, S. A., Powers, A. A., & Johnson, S. (1998). Of horse race and policy issues: A study of gender in coverage of a gubernatorial election by two major metropolitan newspapers. Journalism & Mass Communication Quarterly, 75(1), 194-204.	35	United States	1. United States	Governor		1. Executive	3. Sub-national (state, regional or provincial)	2. Primary election	Plurality/Majority FPTP 1 435 435 FPTP (Electoral System Family | Electoral System for National Legislature | Number of tiers | Legislative size (directly elected) | Legislative size (Voting members) | Electoral system for the president | Source: www.idea.int )	1. Plurality/Majority	7.08	2.14	1.94	435	1993, 1994	1993	1994	11.0345	1. Campaign	1. Manual content analysis	2 newspapers	1. Newspapers	Chicago Sun Times and Chicago Tribune	4. Unknown	No controls	5. None	Dawn Clark Netsch	1	1	3	1	2	312	312	169; 143	Articles by candidate (meaning that an article can be coded for multiple candidates).	Articles by candidate (meaning that an article can be coded for multiple candidates).
2. Second author	56	45	2017	Wagner, Trimble, Sampert and Gerrits (2017)	Wagner et al. (2017)	4	4	1	Gender, Competitiveness, and Candidate Visibility in Newspaper Coverage of Canadian Party Leadership Contests	The International Journal of Press/Politics	1. Journal article	Wagner, A., Trimble, L., Sampert, S., & Gerrits, B. (2017). Gender, Competitiveness, and Candidate Visibility in Newspaper Coverage of Canadian Party Leadership Contests. The International Journal of Press/Politics, 1940161217723150.	0	Canada	3. Other English speaking country	National primary elections	Party leader	4. Other	2. National	2. Primary election	Plurality/Majority FPTP 1 338 338 Not applicable (Electoral System Family | Electoral System for National Legislature | Number of tiers | Legislative size (directly elected) | Legislative size (Voting members) | Electoral system for the president | Source: www.idea.int)	1. Plurality/Majority	9.86	2.96	2.38	264	1975-2012	1975	2012	.	1. Campaign	1. Manual content analysis	Newspapers	1. Newspapers	Globe and Mail	4. Unknown	Executive position, years in federal office, length of leadership race, year story is published, campaign expenditures, novelty	2. Incumbency, competitiveness, standing in the poll, type of seat, party, etc.	NA	1	11	21	10	1	1714	1714	3248	Article per candidate in race	Article per candidate in race
2. Second author	57	46	2005	Niven (2005)	Niven (2005)	0	1	0	Gender bias? Media coverage of women and men in Congress.	Chapter in Gender and American politics. Women, men, and the political process	4. Book chapter	Niven, D. (2005). Gender bias? Media coverage of women and men in Congress. In S. Tolleson-Rinehart & J. Josephson (Eds.), Gender and American politics. Women, men, and the political process (Vol. 2, pp. 264–283). New York: Sharpe.	13	United States	1. United States	House and Senate		2. Legislative	2. National	4. Not applicable, routine times	Plurality/Majority FPTP 1 435 435 FPTP (Electoral System Family | Electoral System for National Legislature | Number of tiers | Legislative size (directly elected) | Legislative size (Voting members) | Electoral system for the president | Source: www.idea.int )	1. Plurality/Majority	3.15	2.25	2.02	435	2001-2003	2001	2003	14	2. Routine	1. Manual content analysis	Newspapers	1. Newspapers	For every member 10 newspaper articles were coded: 5 from from the 'major newspapers' database in Nexis and 5 from home state newspapers of the member that were available in the Nexis database	4. Unknown	No controls because there is no real analysis, only a table with descriptives. But coverage of female members is compared to coverage of male members that most closely resemble them in terms of political traits (party, ideology, and region)	5. None	NA	1	0	146	73	.	1460	1460	1460	Ten newspaperarticles on each member were selected for analysis	There are four categories for the descriptives: women/men and in-state newspapers/major newspapers
2. Second author	58	47	2016	O’Neill, Savigny and Cann (2016)	O’Neill et al. (2016)	3	3	1	Women politicians in the UK press: not seen and not heard?	Feminist Media Studies	1. Journal article	O’Neill, D., Savigny, H., & Cann, V. (2016). Women politicians in the UK press: not seen and not heard?. Feminist Media Studies, 16(2), 293-307.	11	United Kingdom	2. Europe	MPs	MP	2. Legislative	2. National	4. Not applicable, routine times	Plurality/Majority FPTP 1 651 651 Not applicable (Electoral System Family | Electoral System for National Legislature | Number of tiers | Legislative size (directly elected) | Legislative size (Voting members) | Electoral system for the president | Source: www.idea.int)	1. Plurality/Majority	13.55	3.06	2.27	651	1992, 2002, 2012	1992	2012	16.3333	2. Routine	1. Manual content analysis	7 Newspapers	1. Newspapers	The Sun; Daily Mirror; Daily Express; Daily Mail; The Guardian; The Ties; The Daily Telegraph	3. Both	No controls because there is no real analysis, only a table with descriptives.	5. None	NA	1	0	1960	321	7	542	542	542	Newspaper articles in which an MP was mentioned	Unclear: it seems that articles are the coded unit, but then only 1 MP per article can be mentioned. They do not state how they deal with this, but is seems that the article is the coded unit.
2. Second author	59	48	2015	Hayes and Lawless (2015)	Hayes and Lawless (2015)	1	2	0	A non-gendered lens? Media, voters, and female candidates in contemporary congressional elections.	Perspective on Politics	1. Journal article	Hayes, D., & Lawless, J. L. (2015). A non-gendered lens? Media, voters, and female candidates in contemporary congressional elections. Perspectives on Politics, 13(1), 95-118.	46	United States	1. United States	House	House representative	2. Legislative	2. National	1. General election	Plurality/Majority FPTP 1 435 435 FPTP (Electoral System Family | Electoral System for National Legislature | Number of tiers | Legislative size (directly elected) | Legislative size (Voting members) | Electoral system for the president | Source: www.idea.int )	1. Plurality/Majority	3.14	2.15	1.97	435	2010	2010	2010	16.8	1. Campaign	1. Manual content analysis	Newspapers, hundreds of local newspapers	1. Newspapers	The largest circulating local newspaper in the district of the race, that was available through electronic databases or newspaper's online archives	4. Unknown	Controls for whether the opponent is female, whether the candidate is incumbent, whether the candidate is a democrat, and the competitiveness of the race	2. Incumbency, competitiveness, standing in the poll, type of seat, party, etc.	NA	1	342	663	108	342	4748	4748	663	They state that the coding unit is every single mention of a candidate in the newspaper article, but I cannot find the total N for this and this is also not the unit that is analysed	The candidate
2. Second author	60	49	2016	Fernandez-Garcia (2016)	Fernandez-Garcia (2016)	1	1	1	Framing gender and women politicians representation: print media coverage of spanish women ministers.	Book	4. Book chapter	Fernandez-Garcia, N. (2016). Framing gender and women politicians representation: print media coverage of spanish women ministers. CECS-Publicações/eBooks, 141-160.	5	Spain	2. Europe	Ministers	Minister	1. Executive	2. National	4. Not applicable, routine times	PR List PR 1 350 350 Not applicable (Electoral System Family | Electoral System for National Legislature | Number of tiers | Legislative size (directly elected) | Legislative size (Voting members) | Electoral system for the president | Source: www.idea.int)	3. Proportional Representation	5.36	3.21	2.72	350	1996, 2004, 2011	1996	2011	32.4	2. Routine	1. Manual content analysis	4 newspapers	1. Newspapers	El Pais, La Vanguardia, El Mundo and ABC. Daily newspapers with largest circulation and ideologically spread out. Coding 7 days each year: from the day before the appointment of the newly formed Cabinet, to the 5th day after.	4. Unknown	Prestige of the ministry	2. Incumbency, competitiveness, standing in the poll, type of seat, party, etc.	NA	1	0	43	16	4	1969	1969	1969	Articles by candidate (meaning that an article can me coded for multiple candidates).	Articles by candidate (meaning that an article can me coded for multiple candidates). Although the author states that the UoA is the article level, later on (s)he implies that it is article per candidate.
2. Second author	61	50	2018	Aaldering and Van der Pas (2018)	Aaldering and Van der Pas (2018)	2	2	1	Political Leadership in the Media: Gender Bias in Leader Stereotypes during Campaign and Routine Times.	British Journal of Political Science	1. Journal article	Aaldering, L., & Van Der Pas, D. J. (2018). Political Leadership in the Media: Gender Bias in Leader Stereotypes during Campaign and Routine Times. British Journal of Political Science, 1-21.	1	Netherlands	2. Europe	Party leaders	Party leader	3. Executive and legislative	2. National	1. General election	PR List PR 1 150 150 Not applicable (Electoral System Family | Electoral System for National Legislature | Number of tiers | Legislative size (directly elected) | Legislative size (Voting members) | Electoral system for the president | Source: www.idea.int)	3. Proportional Representation	1.03	5.8	5.54	150	2006-2012	2006	2012	36.7	3. Both	2. Automated content analysis	All national daily newspapers	1. Newspapers	All national daily newspapers	3. Both	Party size, double function, and Jackknifed	2. Incumbency, competitiveness, standing in the poll, type of seat, party, etc.	NA	1	3	21	5	12	202631	57126	3312	Articles by party leaders	Weekly data in the published paper: the percentage trait coverage of visibility in the media, per week for each party leader. (Visibility data is from previous version and is based on monthly data).
2. Second author	62	50	2018	Aaldering and Van der Pas (2018)	Aaldering and Van der Pas (2018)	2	2	1	Political Leadership in the Media: Gender Bias in Leader Stereotypes during Campaign and Routine Times.	British Journal of Political Science	1. Journal article	Aaldering, L., & Van Der Pas, D. J. (2018). Political Leadership in the Media: Gender Bias in Leader Stereotypes during Campaign and Routine Times. British Journal of Political Science, 1-21.	1	Netherlands	2. Europe	Ministers	Minister	1. Executive	2. National	4. Not applicable, routine times	PR List PR 1 150 150 Not applicable (Electoral System Family | Electoral System for National Legislature | Number of tiers | Legislative size (directly elected) | Legislative size (Voting members) | Electoral system for the president | Source: www.idea.int)	3. Proportional Representation	1.03	5.8	5.54	150	2006-2012	2006	2012	36.7	3. Both	2. Automated content analysis	All national daily newspapers	1. Newspapers	All national daily newspapers	3. Both	Budget and experience, and Jackknifed	2. Incumbency, competitiveness, standing in the poll, type of seat, party, etc.	NA	1	3	39	8	12	202631	57126	3740	Articles by ministers	Weekly data in the published version of the paper: the percentage trait coverage of visibility in the media, per week for each minister. (Visibility data is from previous version and is based on monthly data).
2. Second author	63	51	2010	Hinojosa (2010)	Hinojosa (2010)	1	1	1	She’s Not My Type of blonde’: Media Coverage of Irena Sáez’s Presidential Bid.”	Chapter in book Cracking the Highest Glass Ceiling: A Global Comparison of Women’s Campaigns for Executive Office	4. Book chapter	Hinojosa, Magda. 2010. "She’s Not My Type of blonde’: Media Coverage of Irena Sáez’s Presidential Bid.” In Cracking the Highest Glass Ceiling: A Global Comparison of Women’s Campaigns for Executive Office, edited by Rainbow Murray and Pippa Norris. Boulder, CO: Praeger. 31-48.	9	Venezuela	4. Rest	Party leaders	Party leader	3. Executive and legislative	2. National	1. General election	Mixed MMP 3 207 207 FPTP (Electoral System Family | Electoral System for National Legislature | Number of tiers | Legislative size (directly elected) | Legislative size (Voting members) | Electoral system for the president | Source: www.idea.int)	2. Mixed Member Proportional	9.6	2.19	1.97	162	1998	1998	1998	15.1	1. Campaign	1. Manual content analysis	1 National newspaper	1. Newspapers	El Universal	4. Unknown	No controls	5. None	Irene Saez	1	1	3	1	1	8902	8902	8902	Paragraphs per candidate	Paragraphs by candidate. The total for the analysed unit is not presented but calculated by us, by summing all paragraphs from table 2.1. However, it is unclear of each paragraph can be devoted to one candidate or that it is paragraph by candidate. Also, the total number of newspaper articles is unclear.
2. Second author	64	52	2003	Sampert and Trimble (2003)	Sampert and Trimble (2003)	2	2	1	’Wham, bam, no thank you ma’am’: Gender and the game frame in national newspaper coverage of election 2000	Women and electoral politics in Canada	4. Book chapter	Sampert, S., & Trimble, L. (2003). ’Wham, bam, no thank you ma’am’: Gender and the game frame in national newspaper coverage of election 2000.', in: Women and electoral politics in Canada, ed. Manon Tremblay and Linda Trimble.Toronto: Oxford University Press.	42	Canada	3. Other English speaking country	Party leaders	Party leader	3. Executive and legislative	2. National	1. General election	Plurality/Majority FPTP 1 338 338 Not applicable (Electoral System Family | Electoral System for National Legislature | Number of tiers | Legislative size (directly elected) | Legislative size (Voting members) | Electoral system for the president | Source: www.idea.int)	1. Plurality/Majority	13.56	3.77	2.54	301	2000	2000	2000	20.6	1. Campaign	1. Manual content analysis	2 English National newspapers	1. Newspapers	Globe and Mail, and National Post	4. Unknown	No controls	5. None	Alexa McDonough	1	1	5	1	2	1465	1465	1465	Headlines of newspaper articles	headlines of articles by candidate
2. Second author	65	53	2005	Bystrom (2005)	Bystrom (2005)	1	1	1	Media content and candidate viability: The case of Elizabeth Dole	Chapter in book Communicating politics: Engaging the public in democratic life	4. Book chapter	Bystrom (2005) Media content and candidate viability: The case of Elizabeth Dole. In M. S. McKinney, D. G. Bystrom, L. L. Kaid, & D. B. Carlin (Eds.), Communicating politics: Engaging the public in democratic life. New York: Peter Lang.	9	United States	1. United States	Rep. Primary	Presidential nominee	1. Executive	2. National	2. Primary election	Plurality/Majority FPTP 1 435 435 FPTP (Electoral System Family | Electoral System for National Legislature | Number of tiers | Legislative size (directly elected) | Legislative size (Voting members) | Electoral system for the president | Source: www.idea.int )	1. Plurality/Majority	2.71	2.21	2.01	435	1999	1999	1999	13.3	1. Campaign	1. Manual content analysis	3 largest state newspapers in Iowa	1. Newspapers	The Des Moines Register, The Cedar Rapids Gazette, The Sioux City Journal	4. Unknown	No controls.	5. None	Elizabeth Dole	1	1	3	1	3	427	427	427	Newspaper articles	newspaper articles per candidate
2. Second author	66	54	2012	Bystrom, Brown and Fiddelke (2012)	Bystrom et al. (2012)	2	3	1	Barriers bent but not broken: Newspaper coverage of local and state elections	Chapter in book Women and executive office: Pathways and performance	4. Book chapter	Bystrom, D.g., Brown, N., & Fiddelke, M. (2012). Barriers bent but not broken: Newspaper coverage of local and state elections. Women and executive office: Pathways and performance, 159-179.	5	United States	1. United States	Mayors	Mayor	1. Executive	4. Local	1. General election	Plurality/Majority FPTP. Exact methods of election may differ per municipality.	1. Plurality/Majority	4.01	2.09	1.94	435	2008	2008	2008	17	1. Campaign	1. Manual content analysis	Newspapers	1. Newspapers	local city newspaper	4. Unknown	No controls.	5. None	NA	1	6	12	6	6	91	91	49	In the analyses, the author focus on the news stories that focus on a single candidate, thus then the unit is newspaper article	Newspaper article by candidate
2. Second author	67	54	2012	Bystrom, Brown and Fiddelke (2012)	Bystrom et al. (2012)	2	3	1	Barriers bent but not broken: Newspaper coverage of local and state elections	Chapter in book Women and executive office: Pathways and performance	4. Book chapter	Bystrom, D.g., Brown, N., & Fiddelke, M. (2012). Barriers bent but not broken: Newspaper coverage of local and state elections. Women and executive office: Pathways and performance, 159-179.	5	United States	1. United States	Governor	Governor	1. Executive	3. Sub-national (state, regional or provincial)	1. General election	Plurality/Majority FPTP 1 435 435 FPTP (Electoral System Family | Electoral System for National Legislature | Number of tiers | Legislative size (directly elected) | Legislative size (Voting members) | Electoral system for the president | Source: www.idea.int )	1. Plurality/Majority	4.01	2.09	1.94	435	2008	2008	2008	17	1. Campaign	1. Manual content analysis	Newspapers	1. Newspapers	largest newspaper per state	4. Unknown	No controls.	5. None	NA	1	4	8	4	4	112	112	64	In the analyses, the author focus on the news stories that focus on a single candidate, thus then the unit is newspaper article	Newspaper article by candidate
2. Second author	68	55	2003	Falk and Jamieson (2003)	Falk and Jamieson (2003)	2	2	1	Changing the Climate of Expectations	Chapter in book Anticipating Madam President	4. Book chapter	Falk, E. & Jamieson, K.H. (2003). Changing the Climate of Expectations. In Anticipating Madam President, edited by Robert P. Watson and Ann Gordon, 43–52. Boulder, CO: Lynne Rienner Publishers.	13	United States	1. United States	Primary	Presidential nominee	1. Executive	2. National	2. Primary election	Plurality/Majority FPTP 1 435 435 FPTP (Electoral System Family | Electoral System for National Legislature | Number of tiers | Legislative size (directly elected) | Legislative size (Voting members) | Electoral system for the president | Source: www.idea.int ), based on data of 1992 to 2016 (no changes in this time period), because dataset doesn't go back to the 1960's.	1. Plurality/Majority	9.92	1.97	1.77	435	1964	1964	1964	2.3	1. Campaign	1. Manual content analysis	Newspapers	1. Newspapers	Very unclear. They state that they study the 'press coverage' of the candidates. Then they state that they examined 3 newspapers from 1964 (page 48). No more information is given.	4. Unknown	No controls.	5. None	Chase Smith	1	1	2	1	3	.	.	.	.	Number of articles per newspaper per month
2. Second author	69	56	2010	Lawrence and Rose (2010)	Lawrence and Rose (2010)	2	2	1	Hillary Clinton's race for the White House: Gender politics and the media on the campaign trail.	Book	3. Book	Lawrence, R. G., & Rose, M. (2010). Hillary Clinton's race for the White House: Gender politics and the media on the campaign trail. Boulder, CO: Lynne Rienner Publishers.	159	United States	1. United States	Primary	Presidential nominee	1. Executive	2. National	2. Primary election	Plurality/Majority FPTP 1 435 435 FPTP (Electoral System Family | Electoral System for National Legislature | Number of tiers | Legislative size (directly elected) | Legislative size (Voting members) | Electoral system for the president | Source: www.idea.int ), based on data of 1992 to 2016 (no changes in this time period), because dataset doesn't go back to the 1960's.	1. Plurality/Majority	4.01	2.09	1.94	435	2008	2007	2008	17.24	1. Campaign	1. Manual content analysis	Newspapers and TV news shows	3. Both newspapers and TV	Los Angeles Times, New York Times and Washington Post	1. Broadsheet / quality	No controls.	5. None	Hillary Clinton	1	1	3	1	6	437	437	437	News stories (newspaper and television)	News story by candidate
2. Second author	70	57	2014	Bystrom and Dimitrova (2014)	Bystrom and Dimitrova (2014)	2	2	1	Migraines, Marriage, and Mascara: Media Coverage of Michele Bachmann in the 2012 Republican Presidential Campaign	American Behavioral Scientist	1. Journal article	Bystrom, D., & Dimitrova, D. V. (2014). Migraines, Marriage, and Mascara: Media Coverage of Michele Bachmann in the 2012 Republican Presidential Campaign. American Behavioral Scientist, 58 (9), 1169-1182.	5	United States	1. United States	Primary	Presidential nominee	1. Executive	2. National	2. Primary election	Plurality/Majority FPTP 1 435 435 FPTP (Electoral System Family | Electoral System for National Legislature | Number of tiers | Legislative size (directly elected) | Legislative size (Voting members) | Electoral system for the president | Source: www.idea.int )	1. Plurality/Majority	3.14	2.15	1.97	435	2011-2012	2011	2012	17.97	1. Campaign	1. Manual content analysis	network and cable television news programs	2. TV	NA	9. Not applicable	No controls.	5. None	Michelle Bachmann	1	1	7	1	6	557	557	557	News shows that mention at least one of the 7 contenders a minimum of five times to ensure that the candidates were more than accidental references (page 1175)	Number of TV shows that mention the candidate
2. Second author	71	58	2012	Falk (2012)	Falk (2012)	1	1	1	Unnatural, Incompetent, and Unviable: Press Portrayals of Women Candidates for President.	Mich. St. L. Rev	1. Journal article	Falk, E. (2012). Unnatural, Incompetent, and Unviable: Press Portrayals of Women Candidates for President. Mich. St. L. Rev., 1671.	1	United States	1. United States	Primary	Presidential nominee	1. Executive	2. National	2. Primary election	Plurality/Majority FPTP 1 435 435 FPTP (Electoral System Family | Electoral System for National Legislature | Number of tiers | Legislative size (directly elected) | Legislative size (Voting members) | Electoral system for the president | Source: www.idea.int )	1. Plurality/Majority	2.27	2.04	1.98	435	1872-2008	1872	2008	.	1. Campaign	1. Manual content analysis	Newspaper articles	1. Newspapers	New York Times and largest circulating newspaper in home state of each candidate	4. Unknown	No controls.	5. None	NA	1	9	18	9	.	.	.	.	Articles that mentioned the candidates	Articles that mentioned the candidates
2. Second author	72	59	in press	Falk (2019)	Falk (2019)	1	1	1	When women run for office: Press coverage of Hillary Clinton during the 2016 presidential campaign	Chapter in book Journalism, Gender and Power.	4. Book chapter	Falk, E. (2019). When women run for office: Press coverage of Hillary Clinton during the 2016 presidential campaign. In C. Carter, L. Steiner and S. Allan (Eds.), Journalism, Gender and Power. New York, NY: Routledge	0	United States	1. United States	President	President	1. Executive	2. National	1. General election	Plurality/Majority FPTP 1 435 435 FPTP (Electoral System Family | Electoral System for National Legislature | Number of tiers | Legislative size (directly elected) | Legislative size (Voting members) | Electoral system for the president | Source: www.idea.int )	1. Plurality/Majority	5.25	2.14	1.98	435	2016	2016	2016	19.67	1. Campaign	2. Automated content analysis	Newspaper articles	1. Newspapers	US newspapers in LexisNexis database	4. Unknown	No controls.	5. None	Hillary Clinton	1	1	2	1	.	.	.	.	Automated content analysis, in which she searched the Lexis Nexis database for newspaperarticles on Trump and Clinton	Automated content analysis, in which she searched the Lexis Nexis database for newspaperarticles on Trump and Clinton
2. Second author	73	60	2016	Foster Shoaf and Parsons (2016)	Foster Shoaf and Parsons (2016)	2	2	1	18 Million Cracks, but No Cigar: News Media and the Campaigns of Clinton, Palin, and Bachmann	Social Sciences	1. Journal article	Foster Shoaf, N. R., & Parsons, T. N. (2016). 18 Million Cracks, but No Cigar: News Media and the Campaigns of Clinton, Palin, and Bachmann. Social Sciences, 5(3), 50.	0	United States	1. United States	Primary		1. Executive	2. National	2. Primary election	Plurality/Majority FPTP 1 435 435 FPTP (Electoral System Family | Electoral System for National Legislature | Number of tiers | Legislative size (directly elected) | Legislative size (Voting members) | Electoral system for the president | Source: www.idea.int )	1. Plurality/Majority	4.01	2.09	1.94	435	2007-2012	2007	2012	17.5	1. Campaign	1. Manual content analysis	Newspapers and TV news shows	3. Both newspapers and TV	USA Today; New York Times; Chicago Sun; Dallas Morning News; San Jose Mercury	3. Both	No controls.	5. None	NA	1	3	7	3	8	1200	1200	908	News stories (newspaper and television)	News story by candidate
2. Second author	74	61	2011	Uscinski and Goren (2011)	Uscinski and Goren (2011)	1	2	0	What’s in a name? Coverage of Senator Hillary Clinton during the 2008 Democratic Primary.	Political Research Quarterly	1. Journal article	Uscinski, J. E., & Goren, L. J. (2011). What’s in a name? Coverage of Senator Hillary Clinton during the 2008 Democratic Primary. Political Research Quarterly, 64(4), 884-896.	60	United States	1. United States	Primary		1. Executive	2. National	2. Primary election	Plurality/Majority FPTP 1 435 435 FPTP (Electoral System Family | Electoral System for National Legislature | Number of tiers | Legislative size (directly elected) | Legislative size (Voting members) | Electoral system for the president | Source: www.idea.int )	1. Plurality/Majority	4.01	2.09	1.94	435	2007-2008	2007	2008	17.24	1. Campaign	1. Manual content analysis	network and cable television news programs	2. TV	NA	9. Not applicable	No controls.	5. None	Hillary Clinton	1	1	2	1	6	600	600	1135	News shows that mention at least once Clinton or Obama	Each first mention of Clinto or Obama in a news story
1. First author	75	62	2017	Trimble (2017)	Trimble (2017)	1	1	1	Ms. Prime Minister: Gender, Media and Leadership	Book	3. Book	Trimble, L. (2017). Ms. Prime Minister: Gender, Media, and Leadership. University of Toronto Press.	1	Canada, New Zealand, Australia.	3. Other English speaking country	Prime minister		1. Executive	2. National	1. General election	Australia: 2010 Plurality/Majority AV 1 150 150 Not applicable (female representation: 27.3) Canada: 1993 Plurality/Majority FPTP 1 295 295 Not applicable (female regresentation: 13.3) New Zealand: 1996 Mixed MMP 3 120 120 Not applicable (source: IDEA) (female representation: 29.2)	4. Other	.	.	.	.	1993, 1996, 1999, 2002, 2005, 2008, 2010	1993	2010	.	1. Campaign	1. Manual content analysis	Newspapers (national or main regional ones), TV is also analysed for qualitative analyses of the leadership ascensions	1. Newspapers	Three newspapers per country. For Canada: Globe and Mail (national), Vancouver Sun (regional) and Montreal Gazette (regional). New Zealand: Dominion Post (earlier Dominion and Evening Post, regional), New Zealand Herald (regional) and Press (regional). Australia: the Australian, the Sydney Morning Herald and the Age (leading broadsheets).	4. Unknown	Paired sample: the direct male competitor during elections	5. None	NA	3	7	10	4	9	2550	2550	10	Newspaper articles.	Percentage of type of coverage per leader. At some instance, amount of a type of mention per leader.
1. First author	76	63	2013	Goodyear-Grant (2013)	Goodyear-Grant (2013)	1	1	1	Gendered news: Media coverage and electoral politics in Canada	Book	3. Book	Goodyear-Grant, E. (2013). Gendered news: Media coverage and electoral politics in Canada. UBC Press.	33	Canada	3. Other English speaking country	Party leaders	Party leader	2. Legislative	2. National	1. General election	Plurality/Majority FPTP 1 338 338 Not applicable (Electoral System Family | Electoral System for National Legislature | Number of tiers | Legislative size (directly elected) | Legislative size (Voting members) | Electoral system for the president | Source: www.idea.int)	1. Plurality/Majority	13.56	3.77	2.54	301	2000	2000	2000	20.6	1. Campaign	1. Manual content analysis	TV, four networks (CBC, CTV, SRC, and TVA) collected by the 2000 Canadian Election Study. Two of the broadcasters are private (CTV and TVA) and two public (CBC and SRC).	2. TV	NA	9. Not applicable	No formal controls, focus in the comparison on politicians with similar standings in the polls	5. None	Alexa McDonough	1	1	5	1	4	825	825	825	News story on TV news; a subanalysis on one broadcaster uses sub-story level	News stories per politician; a subanalysis on one broadcaster uses sub-story level per candidate
1. First author	77	63	2013	Goodyear-Grant (2013)	Goodyear-Grant (2013)	1	1	1	Gendered news: Media coverage and electoral politics in Canada	Book	3. Book	Goodyear-Grant, E. (2013). Gendered news: Media coverage and electoral politics in Canada. UBC Press.	33	Canada	3. Other English speaking country	Candidates for parliament other than party leaders	MP	2. Legislative	2. National	1. General election	Plurality/Majority FPTP 1 338 338 Not applicable (Electoral System Family | Electoral System for National Legislature | Number of tiers | Legislative size (directly elected) | Legislative size (Voting members) | Electoral system for the president | Source: www.idea.int)	1. Plurality/Majority	13.56	3.77	2.54	301	2000	2000	2000	20.6	1. Campaign	1. Manual content analysis	CBC The National, extra analysis beyond just the party leaders	2. TV	NA	9. Not applicable	No formal controls, focus in the comparison on politicians with similar standings in the polls	5. None	NA	1	1	1808	373	1	.	114	114	Sound bites	Sound bites per gender
1. First author	78	63	2013	Goodyear-Grant (2013)	Goodyear-Grant (2013)	1	1	1	Gendered news: Media coverage and electoral politics in Canada	Book	3. Book	Goodyear-Grant, E. (2013). Gendered news: Media coverage and electoral politics in Canada. UBC Press.	33	Canada	3. Other English speaking country	Candidates for parliament (including party leaders)	MP, party leader	2. Legislative	2. National	1. General election	Plurality/Majority FPTP 1 338 338 Not applicable (Electoral System Family | Electoral System for National Legislature | Number of tiers | Legislative size (directly elected) | Legislative size (Voting members) | Electoral system for the president | Source: www.idea.int)	1. Plurality/Majority	9.81	3.78	3.03	308	2005, 2006	2005	2006	20.8	1. Campaign	1. Manual content analysis	7 newspapers (Gloabe and Mail, National Post, Vancouver Sun, Calgary Herald, Toronto Star, La Presse, and Le Devoir) collected by the McGill Media Observatory	1. Newspapers	7 newspapers (Gloabe and Mail, National Post, Vancouver Sun, Calgary Herald, Toronto Star, La Presse, and Le Devoir) collected by the McGill Media Observatory	4. Unknown	No formal controls, focus in the comparison on politicians with similar function, for example by excluding party leaders from analysis.	5. None	NA	1	1	1634	380	7	698	698	698	Articles	Articles per politician
1. First author	79	64	2011	Hayes (2011)	Hayes (2011)	0	1	0	When Gender and Party Collide: Stereotyping in Candidate Trait Attribution.	Politics & Gender	1. Journal article	Hayes, D. (2011). When gender and party collide: Stereotyping in candidate trait attribution. Politics & Gender, 7(2), 133-165.	147	United States	1. United States	Senate		2. Legislative	2. National	1. General election	Plurality/Majority FPTP 1 435 435 FPTP (Electoral System Family | Electoral System for National Legislature | Number of tiers | Legislative size (directly elected) | Legislative size (Voting members) | Electoral system for the president | Source: www.idea.int )	1. Plurality/Majority	1.57	2.1	1.99	435	2006	2006	2006	16.3	1. Campaign	1. Manual content analysis	Newspaper: the largest newspaper in each of the 30 states during the last month of the campaign. Using Nexis and Newsbank batabases, coded every article that mentioned at least one of the two senate candidates.	1. Newspapers	One newspaper per state (largest newspaper). Using Nexis and Newsbank batabases, coded every article that mentioned at least one fo the two senate candidates.	4. Unknown	No controls. Content analysis is not the main dependent variable of the article (it is used as an inderpendent variable explaining voter behavior).	5. None	NA	1	30	60	12	.	1345	1345	1143	Articles / paragraphs	Paragraphs. The N displayed here is the number of paragraphs coded with trait descriptions.
1. First author	80	65	2007	Banducci, Karp and Kittilson (2007)	Banducci et al. (2007)	2	3	1	Representation, Political Engagement, and Women’s Visibility in Electoral Politics: A Comparative Perspective	Conference	2. Conference paper	Banducci, S., Karp, J., & Kittilson, M. C. (2007). Representation, Political Engagement, and Women’s Visibility in Electoral Politics: A Comparative Perspective. In annual meeting of the American Political Science Association, Chicago, IL.	5	EU: 25 countries	2. Europe	MEPs	MEP	2. Legislative	1. Supranational	1. General election	Proportional representation (Party Lists and Single Transferable Vote depending on country)	3. Proportional Representation	.	.	.	.	2004	2004	2004	17.7	1. Campaign	1. Manual content analysis	Both television news and newspapers were coded in each country. 2 With two television news outlets and three newspapers per country, the sample consists of 48 television networks (in Belgium two French and two Flemish stations were included) and 75 newspapers. For newspapers, three weeks prior to the election are covered and for television the two weeks prior to the election are covered. The enti…	3. Both newspapers and TV	Three newspapers per country. The front page and one random chosen inside page of the newspaper were analyzed.	3. Both	No controls	5. None	NA	25	25	Around 7000 (rough estimate)	About 2285 (rough estimate)	123	45651	45651	25	Stories	Countries
1. First author	81	66	2014	Fridkin and Kenney (2014)	Fridkin and Kenney (2014)	1	2	1	The changing face of representation: The gender of US senators and constituent communications.	Book	3. Book	Fridkin, K., & Kenney, P. (2014). Coverage of Senators in the Local Press. Chapter 5 in The changing face of representation: The gender of US senators and constituent communications. University of Michigan Press.	33	United States	1. United States	Senate	Senator	2. Legislative	2. National	1. General election	Plurality/Majority FPTP 1 435 435 FPTP (Electoral System Family | Electoral System for National Legislature | Number of tiers | Legislative size (directly elected) | Legislative size (Voting members) | Electoral system for the president | Source: www.idea.int )	1. Plurality/Majority	1.57	2.1	1.99	435	2006	2006	2006	16.3	3. Both	1. Manual content analysis	Newspaper, one local state paper per state	1. Newspapers	One newspaper per state	4. Unknown	Party, reelection year, seniority (years in senate), newspaper circulation (logged), press releases by senator (logged)	3. Both candidate communication and incumbency etc.	NA	1	.	32	14	16 to 32	3822	3822	3822	Articles	Articles
1. First author	82	66	2014	Fridkin and Kenney (2014)	Fridkin and Kenney (2014)	1	2	1	The changing face of representation: The gender of US senators and constituent communications.	Book	3. Book	Fridkin, K., & Kenney, P. (2014). The Impact of the Senator's Gender during Reelection Campagns. Chapter 7 in The changing face of representation: The gender of US senators and constituent communications. University of Michigan Press.	33	United States	1. United States	Senate		2. Legislative	2. National	1. General election	Plurality/Majority FPTP 1 435 435 FPTP (Electoral System Family | Electoral System for National Legislature | Number of tiers | Legislative size (directly elected) | Legislative size (Voting members) | Electoral system for the president | Source: www.idea.int )	1. Plurality/Majority	1.57	2.1	1.99	435	2006	2006	2006	16.3	1. Campaign	1. Manual content analysis	Newspaper, one local state paper per state	1. Newspapers	One newspaper per state	4. Unknown	Party, reelection year, seniority (years in senate), newspaper circulation (logged), press releases by senator (logged)	3. Both candidate communication and incumbency etc.	NA	1	27	21	6	11 to 21	2077	2077	2077	Articles	Articles
1. First author	83	67	2013	Meeks (2013)	Meeks (2013)	1	1	1	All the gender that’s fit to print: How the New York Times covered Hillary Clinton and Sarah Palin in 2008	Journalism & Mass Communication Quarterly	1. Journal article	Meeks, L. (2013). All the gender that’s fit to print: How the New York Times covered Hillary Clinton and Sarah Palin in 2008. Journalism & Mass Communication Quarterly, 90(3), 520-539.	40	United States	1. United States	Presidential candidates and vice-presidential candidates		1. Executive	2. National	3. Both primary and general election	Plurality/Majority FPTP 1 435 435 FPTP (Electoral System Family | Electoral System for National Legislature | Number of tiers | Legislative size (directly elected) | Legislative size (Voting members) | Electoral system for the president | Source: www.idea.int )	1. Plurality/Majority	14.24	2.05	1.77	538	2007, 2008	2007	2008	16.3	1. Campaign	1. Manual content analysis	Newspaper (New York Times)	1. Newspapers	New York Times (newspaper)	1. Broadsheet / quality	No formal controls. By design some control: the female candidates (Hillary Clinton and Sarah Palin) are compared to their direct male competitors. In Clinton's case it is a candidate from the same party, thus effectively controlling for party. In Palin's case, the male candidate is from a different party.	5. None	NA	1	2	4	2	1	276	276	276	Articles	Articles
1. First author	84	68	2019	Renner and Masch (2019)	Renner and Masch (2019)	2	2	1	Emotional woman–rational man? Gender stereotypical emotional expressivity of German politicians in news broadcasts	Communications	1. Journal article	Renner, A. M., & Masch, L. (2019). Emotional woman–rational man? Gender stereotypical emotional expressivity of German politicians in news broadcasts. Communications, 44(1), 81-103.	0	Germany	2. Europe	Relevant actors are defined as German politicians holding important positions in the past or present in the executive or legislative body or in a party on a European, federal, or state level		3. Executive and legislative	5. Combination of federal, national and/or sub-national level	1. General election	Mixed MMP(FPTP and List PR) 2 614 614 Not applicable (Electoral System Family | Electoral System for National Legislature | Number of tiers | Legislative size (directly elected) | Legislative size (Voting members) | Electoral system for the president | Source: www.idea.int )	2. Mixed Member Proportional	7.83	4.81	3.51	631	2013, 2014	2013	2014	36.5	3. Both	1. Manual content analysis	TV, news programs of the five most important public and private TV channels	2. TV	NA	9. Not applicable	Age, party affiliation, level of the office (state, national, European), election time, public or private TV channel	2. Incumbency, competitiveness, standing in the poll, type of seat, party, etc.	NA	1	.	127	33	5	954	954	1083	Every video sequence (footage between two cuts) in which one can recognize one or more politicians forms a unit of analysis.	Politicians in video segments
1. First author	85	69	2019	Sjøvaag and Pedersen (2019)	Sjøvaag and Pedersen (2019)	1	2	1	Female voices in the news: Structural conditions of gender representations in Norwegian newspapers.	Journalism & Mass Communication Quarterly	1. Journal article	Sjøvaag, H., & Pedersen, T. A. (2019). Female voices in the news: Structural conditions of gender representations in Norwegian newspapers. Journalism & Mass Communication Quarterly, 96(1), 215-238.	4	Norway	2. Europe	Politicians (can be any office)	Politician (any)	3. Executive and legislative	5. Combination of federal, national and/or sub-national level	4. Not applicable, routine times	PR List PR 2 169 169 Not applicable (Electoral System Family | Electoral System for National Legislature | Number of tiers | Legislative size (directly elected) | Legislative size (Voting members) | Electoral system for the president | Source: www.idea.int )	3. Proportional Representation	2.56	4.87	4.39	169	2015	2015	2015	39.6	2. Routine	1. Manual content analysis	Newspapers	1. Newspapers	'a representative sample of 75 news outlets in Norway' [..] 'six national newspapers and the online news editions of two national broadcasters; six metropolitan newspapers; and 63 local papers published in all regions of the country'	3. Both	No controls	5. None	NA	1	0	1264 (very rough estimate)	.	75	5544	5544	1264	Articles	Politicians (sources) in articles, i.e., names appearing in the news
1. First author	86	70	2017	Sensales and Arenia (2017)	Sensales and Arenia (2017)	2	2	1	Gender Biases and Linguistic Sexism in Political Communication: A Comparison of Press News About Men and Women Italian Ministers.	Journal of Social and Political Psychology		Sensales, G., & Arenia, A. (2017). Gender Biases and Linguistic Sexism in Political Communication: A Comparison of Press News About Men and Women Italian Ministers. Journal of Social and Political Psychology, 5(2), 512-536.	4	Italy	2. Europe	Ministers	Minister	1. Executive	2. National	4. Not applicable, routine times	PR List PR 1 630 630 Not applicable (Electoral System Family | Electoral System for National Legislature | Number of tiers | Legislative size (directly elected) | Legislative size (Voting members) | Electoral system for the president | Source: www.idea.int )	3. Proportional Representation	17.34	5.33	3.47	617	2014	2014	2014	31.4	2. Routine	1. Manual content analysis	Newspapers	1. Newspapers	five Italian newspapers with different cultural-ideological orientations: L’Unità and La Repubblica on the left/center-left, Il Corriere della Sera of the center, and Il Giornale and Il Tempo on the right/center-right. The headlines included above-headline (brief introduction to the news), sub-headline (which clarifies and adds some detail to the news), and summary (which highlights some specific…	4. Unknown	No controls	5. None	NA	1	0	18	9	5	332	332	332	Headlines of newspaper articles	headlines of articles
2. Second author	87	71	2013	Trimble, Wagner, Sampert, Raphael and Gerrits (2013)	Trimble et al. (2013)	5	5	1	Is it personal? Gendered mediation in newspaper coverage of Canadian national party leadership contests, 1975-2012	The International Journal of Press/Politics	1. Journal article	Trimble, L., Wagner, A., Sampert, S., Raphael, D., & Gerrits, B. (2013). Is it personal? Gendered mediation in newspaper coverage of Canadian national party leadership contests, 1975–2012. The International Journal of Press/Politics, 18(4), 462-481.	36	Canada	3. Other English speaking country	Primary	Party leader	2. Legislative	2. National	2. Primary election	Plurality/Majority FPTP 1 338 338 Not applicable (Electoral System Family | Electoral System for National Legislature | Number of tiers | Legislative size (directly elected) | Legislative size (Voting members) | Electoral system for the president | Source: www.idea.int)	1. Plurality/Majority	10.41	3.09	2.45	282	1975-2012	1975	2012	14.7816	1. Campaign	1. Manual content analysis	Newspaper: Globe and Mail	1. Newspapers	Globe and Mail	1. Broadsheet / quality	No formal controls. By design some control: female candidates are compared to male close competitors (closest in the final election results, but also winner is always included and 2 all male races included, thus 'popularity in the pols' is not really included by design). Definitely controlled by design: the party (primary elections)	5. None	NA	1	15	30	15	1	2463	2463	3458	Articles	Article per politician
2. Second author	88	72	2016	Sensales, Areni and Dal Secco (2016)	Sensales et al. (2016)	3	3	1	Italian political communication and gender bias: Press representations of men/women presidents of the Houses of Parliament (1979, 1994, and 2013)	International Journal of Society, Culture and Language	1. Journal article	Sensales, G., Areni, A., & Dal Secco, A. (2016). Italian political communication and gender bias: Press representations of men/women presidents of the Houses of Parliament (1979, 1994, and 2013). International Journal of Society, Culture & Language, 4(2), 22-38.	3	Italy	2. Europe	Presidents of the Houses of Parliament	President of the Houses of Parliament	2. Legislative	2. National	4. Not applicable, routine times	1992: PR List PR 1 630 630 Not applicable; 1994: 1994 Mixed MMP 2 630 630 Not applicable; 2013: PR List PR 1 630 630 Not applicable (Electoral System Family | Electoral System for National Legislature | Number of tiers | Legislative size (directly elected) | Legislative size (Voting members) | Electoral system for the president | Source: www.idea.int )	4. Other	9.28	5.01667	4.87	625.667	1979, 1994, 2013	1979	2013	31.4	2. Routine	1. Manual content analysis	5 newspapers	1. Newspapers	L'Unita; La Repubblica; Il Corriere sella Serra; Il Tempo; Il Giornale	4. Unknown	No formal controls. By design some control: female presidents of the champber of Deputies are compared to male heads of the Senate.	5. None	NA	1	0	6	3	5	591	591	591	Headlines of newspaper articles	headlines of newspaper articles
2. Second author	89	73	2018	Smith (2018)	Smith (2018)	1	1	1	Politics and parenthood: an examination of UK party leadership elections	Parliamentary Affairs	1. Journal article	Smith, J. C. (2017). Politics and parenthood: an examination of UK party leadership elections. Parliamentary Affairs, 71(1), 196-217.	3	United Kingdom	2. Europe	Party leadership elections	Party leader	2. Legislative	2. National	2. Primary election	Plurality/Majority FPTP 1 651 651 Not applicable (Electoral System Family | Electoral System for National Legislature | Number of tiers | Legislative size (directly elected) | Legislative size (Voting members) | Electoral system for the president | Source: www.idea.int)	1. Plurality/Majority	14.6375	3.5175	2.4	646.5	1975, 1994, 2015, 2016	1975	2016	17.5	1. Campaign	1. Manual content analysis	4 newspapers (unclear which ones)	1. Newspapers	unclear	3. Both	No formal controls. By design some control: the party (primary elections)	5. None	NA	1	4	19	6	.	1669	1669	1669	Mentions of candidates in articles	Mentions of candidates in articles
2. Second author	90	74	2016	Besco, Gerrits, & Matthews (2016)	Besco et al. (2016)	1	3	0	White Millionaires and Hockey Skates: Racialized and Gendered Mediation in News Coverage of a Canadian Mayoral Election	International Journal of Communication	1. Journal article	Besco, R., Gerrits, B., & Matthews, J. S. (2016). White Millionaires and Hockey Skates: Racialized and Gendered Mediation in News Coverage of a Canadian Mayoral Election. International Journal of Communication, 10, 20.	2	Canada	3. Other English speaking country	Mayors	Mayor	1. Executive	4. Local	1. General election	Plurality/Majority FPTP 1 338 338 Not applicable (Electoral System Family | Electoral System for National Legislature | Number of tiers | Legislative size (directly elected) | Legislative size (Voting members) | Electoral system for the president | Source: www.idea.int)	1. Plurality/Majority	12.42	3.43	2.41	308	2014	2014	2014	25.1	1. Campaign	1. Manual content analysis	2 newspapers	1. Newspapers	Toronto Star and Toronto Sun	3. Both	No formal controls	5. None	NA	1	1	5	2	2	325	325	325	random sample of 325 newspaper articles (out of population of 948 articles) that mention the candiate as running for the mayoral office or the mayoral election)	newspaper articles
[truncated: 97 more columns]

## Sheet: Labels
outlettype	region	officetype	officelevel	electiontype	electoralsystemtype	campaign	method	mediumtype	newspapertype	controltype	original	r_visibility	r_tone	r_viability	r_viabilityassessment	r_family	r_appearance	r_background	r_traitamount	r_issueamount	r_issuestereotypes	r_traitsstereotypes	r_traitsleadership	r_mentiongender	r_quote	coder	control_race	control_proximityelection	control_electoralsystem	control_typeofoffice	control_period	control_region	control_femalerepresentation	control_ownmessage	control_cometitiveness	control_incumbency	control_fundraising	control_party	control_partysize	control_powerposition	control_listposition	control_experience	control_age	control_activity	control_novelty	control_genderopponent	control_newspaperposition	control_newspapertype	control_newspapersize
1. Journal article	1. United States	1. Executive	1. Supranational	1. General election	1. Plurality/Majority	1. Campaign	1. Manual content analysis	1. Newspapers	1. Broadsheet / quality	1. Candidate's own campaign messages / communication	1. Part of original set	1. Men more, significant	1. Men more positive, significant	1. Women more viability coverage, significant	1. Men considered more viable, significant	1. Women more family coverage, significant	1. Women more appearance coverage, significant	1. Women more background coverage, significant	1. Women more trait coverage, significant	1. Men more issue coverage, significant	1. Men more on male issues, women more on female issues, significant	1. Men more on male traits, women more on female traits, significant	1. Men more leadership coverage, significant	1. Women more mention of their gender, significant	1. Women quoted less often, significant	1. First author	0. Per candidate	0. No control	0. No control	0. No control	0. No control	0. No control	0. No control	0. No control	0. No control	0. No control	0. No control	0. No control	0. No control	0. No control	0. No control	0. No control	0. No control	0. No control	0. No control	0. No control	0. No control	0. No control	0. No control
2. Conference paper	2. Europe	2. Legislative	2. National	2. Primary election	2. Mixed Member Proportional	2. Routine	2. Automated content analysis	2. TV	2. Tabloid	2. Incumbency, competitiveness, standing in the poll, type of seat, party, etc.	2. Not part of original set	2. Men more, non-significant or unknown significance	2. Men more positive, mixed significance	2. Women more viability coverage, mixed significance	2. Men considered more viable, mixed significance	2. Women more family coverage, mixed significance	2. Women more appearance coverage, mixed significance	2. Women more background coverage, mixed significance	2. Women more trait coverage, mixed significance	2. Men more issue coverage, mixed significance	2. Men more on male issues, men more on female issues, significant	2. Men more on male traits, men more on female traits, significant	2. Men more leadership coverage, mixed significance	2. Women more mention of their gender, mixed significance	2. Women quoted less often, mixed significance	2. Second author	1. Per race	1. Control by design	1. Control by design	1. Control by design	1. Control by design	1. Control by design	1. Control by design	1. Control by design	1. Control by design through informal selection of 'comparable' candidates	1. Control by design	1. Control by design	1. Control by design	1. Control by design	1. Control by design	1. Control by design, e.g., no party lists because single-member district	1. Control by design	1. Control by design	1. Control by design	1. Control by design	1. Control by design	1. Control by design	1. Control by design	1. Control by design
3. Book	3. Other English speaking country	3. Executive and legislative	3. Sub-national (state, regional or provincial)	3. Both primary and general election	3. Proportional Representation	3. Both	3. Combination of manual and automatic content analysis	3. Both newspapers and TV	3. Both	3. Both candidate communication and incumbency etc.		3. Equal	3. Men more positive, unknown significance	3. Women more viability coverage, unknown significance	3. Men considered more viable, unknown significance	3. Women more family coverage, unknown significance	3. Women more appearance coverage, unknown significance	3. Women more background coverage, unknown significance	3. Women more trait coverage, unknown significance	3. Men more issue coverage, unknown significance	3. Women more on male issues, women more on female issues, significant	3. Women more on male traits, women more on female traits, significant	3. Men more leadership coverage, unknown significance	3. Women more mention of their gender, unknown significance	3. Women quoted less often, unknown significance			2. Statistical control	2. Statistical control	2. Statistical control	2. Statistical control	2. Statistical control	2. Statistical control	2. Statistical control	2. Control by design through matched sample	2. Statistical control	2. Statistical control	2. Statistical control	2. Statistical control	2. Statistical control	3. Statistical control minimal (categorical)	2. Statistical control	2. Statistical control	2. Statistical control	2. Statistical control	2. Statistical control	2. Statistical control	2. Statistical control	2. Statistical control
4. Book chapter	4. Rest	4. Other	4. Local	4. Not applicable, routine times	4. Other			4. Other	4. Unknown	4. Other		4. Women more, non-significant or unknown significance	4. Equal	4. Equal	4. Equal	4. Equal	4. Equal	4. Equal	4. Equal	4. Equal	4. Women more on male issues, men more on female issues, significant	4. Women more on male traits, men more on female traits, significant	4. Equal	4. Equal	4. Equal										3. Statistical control						4. Statistical control maximal (interval)
5. Other			5. Combination of federal, national and/or sub-national level						9. Not applicable	5. None		5. Women more, significant	5. Women more positive, unknown significance	5. Men more viability, unknown significance	5. Women considered more viable, unknown significance	5. Men more family, unknown significance	5. Men more appearance, unknown significance	5. Men more background coverage, unknown significance	5. Men more trait coverage, unknown significance	5. Women more issue coverage, unknown significance	5. Men more on male issues, women more on female issues, mixed significance	5. Men more on male traits, women more on female traits, mixed significance	5. Women more leadership, unknown significance	5. Men more mention of their gender, unknown significance	5. Men quoted less often, unknown significance
			6. Other									9. NA, article does not inspect this aspect of media coverage	6. Women more positive, mixed significance	6. Men more viability, mixed significance	6. Women considered more viable, mixed significance	6. Men more family, mixed significance	6. Men more appearance, mixed significance	6. Men more background coverage, mixed significance	6. Men more trait coverage, mixed significance	6. Women more issue coverage, mixed significance	6. Men more on male issues, men more on female issues, mixed significance	6. Men more on male traits, men more on female traits, mixed significance	6. Women more leadership, mixed significance	6. Men more mention of their gender, mixed significance	6. Men quoted less often, mixed significance
													7. Women more positive, significant	7. Men more viability coverage, significant	7. Women considered more viable, significant	7. Men more family coverage, significant	7. Men more appearance coverage, significant	7. Men more background coverage, significant	7. Men more trait coverage, significant	7. Women more issue coverage, significant	7. Women more on male issues, women more on female issues, mixed significance	7. Women more on male traits, women more on female traits, mixed significance	7. Women more leadership coverage, significant	7. Men more mention of their gender, significant	7. Men quoted less often, significant
													9. NA, article does not inspect this aspect of media coverage	9. NA, article does not inspect this aspect of media coverage	9. NA, article does not inspect this aspect of media coverage	9. NA, article does not inspect this aspect of media coverage	9. NA, article does not inspect this aspect of media coverage	9. NA, article does not inspect this aspect of media coverage	9. NA, article does not inspect this aspect of media coverage	9. NA, article does not inspect this aspect of media coverage	8. Women more on male issues, men more on female issues, mixed significance	8. Women more on male traits, men more on female traits, mixed significance	9. NA, article does not inspect this aspect of media coverage	9. NA, article does not inspect this aspect of media coverage	9. NA, article does not inspect this aspect of media coverage
																					9. Men more on male issues, women more on female issues, unknown significance	9. Men more on male traits, women more on female traits, unknown significance
																					10. Men more on male issues, men more on female issues, unknown significance	10. Men more on male traits, men more on female traits, unknown significance
																					11. Women more on male issues, women more on female issues, unknown significance	11. Women more on male traits, women more on female traits, unknown significance
																					12. Women more on male issues, men more on female issues, unknown significance	12. Women more on male traits, men more on female traits, unknown significance
																					13. No differences	13. No differences
																					14. NA, article does not inspect this aspect of media coverage	14. NA, article does not inspect this aspect of media coverage
[truncated: 1 more columns]
